# Supplementary material
Source: publisher figshare collection journal article supplement (https://tandf.figshare.com/articles/dataset/_/12108642)
Supplement: Supplementary file 1 [file 1]

# Main Map 2: Examples of changes in geomorphology following a glacial lake outburst flood, Zackenberg River, Northeast Greenland

Aleksandra M. Tomczyk and Marek W. Ewertowski

alto@amu.edu.pl

evert@amu.edu.pl

Faculty of Geographical and Geological Sciences, Adam Mickiewicz University, Poznań, Poland

5 August 2017 - before flood

8 August 2017 - after flood

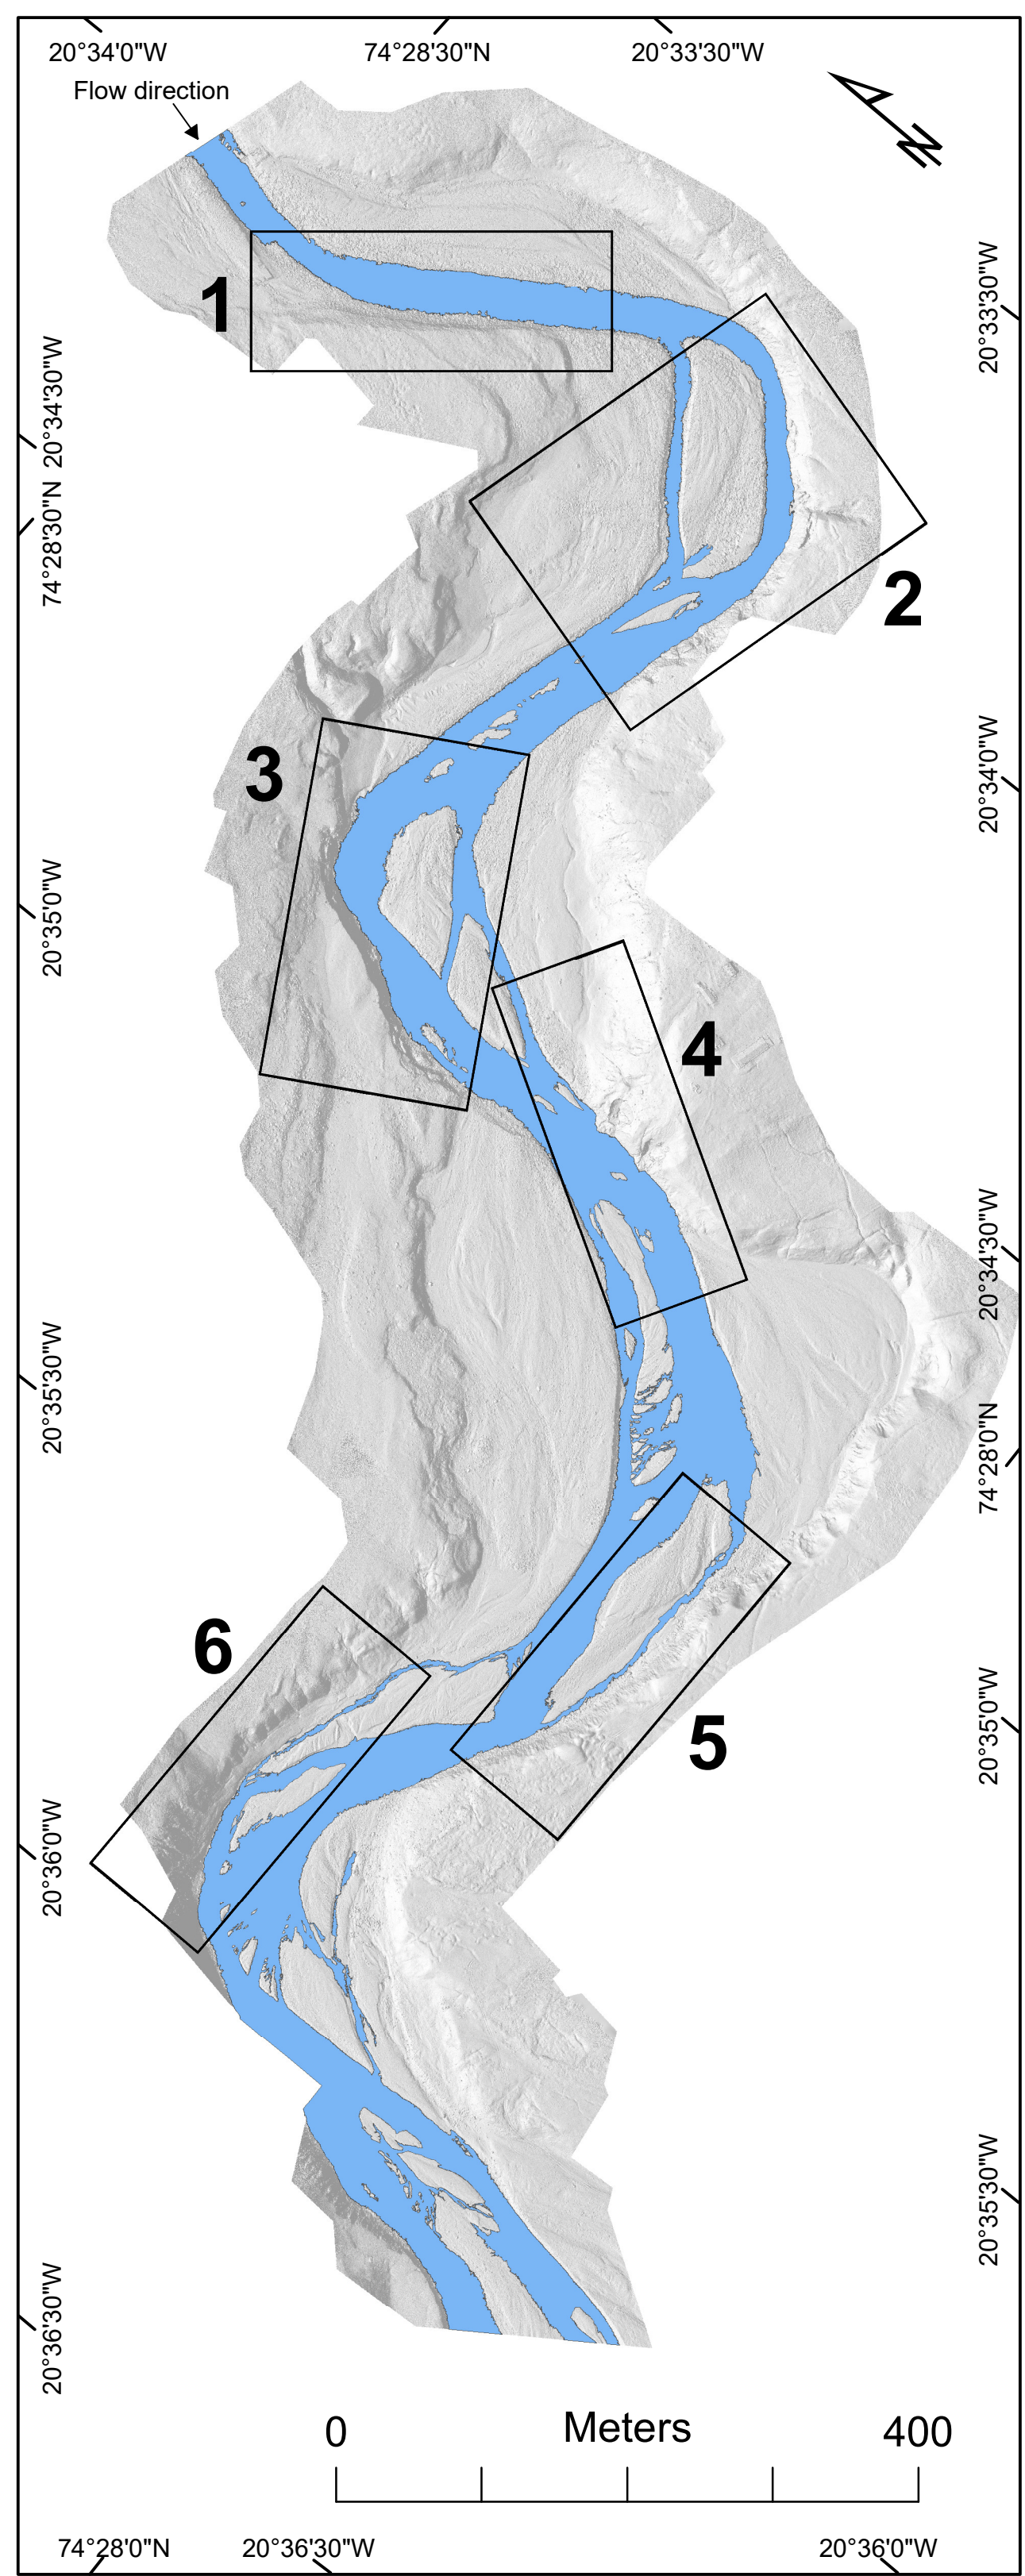

## Mass movement types

- Debris slide (Slump)
- Debris flow
- Debris fall
- Blockfall

## River bank slope types

- Gentle slope ( $>15^\circ$ )
- Moderately steep slope ( $15-35^\circ$ )
- Steep slope ( $35-90^\circ$ )
- Undercut bank ( $>90^\circ$ )

Active fluvial scarp - location on 5 August 2017

Active fluvial scarp - location on 8 August 2017

Stable fluvial scarp

Old failure scar

## Fluvial features

- Modern floodplain (gravel and sand deposits)
- Vegetated floodplain
- Relict fluvial terrace
- Alluvial fan
- Fresh fluvial deposit (zone of the flood)

## Periglacial features

- Thermoerosional gully
- Solifluction lobe
- Ice wedges

## Hydrological features

- Water
- Snow patch
- Drainage

## Other features

- Flat area and gentle slope (less than  $15^\circ$ )
- Moderately and steep slope (more than  $15^\circ$ )

## Topographic elements

- 4x4 off-road trail

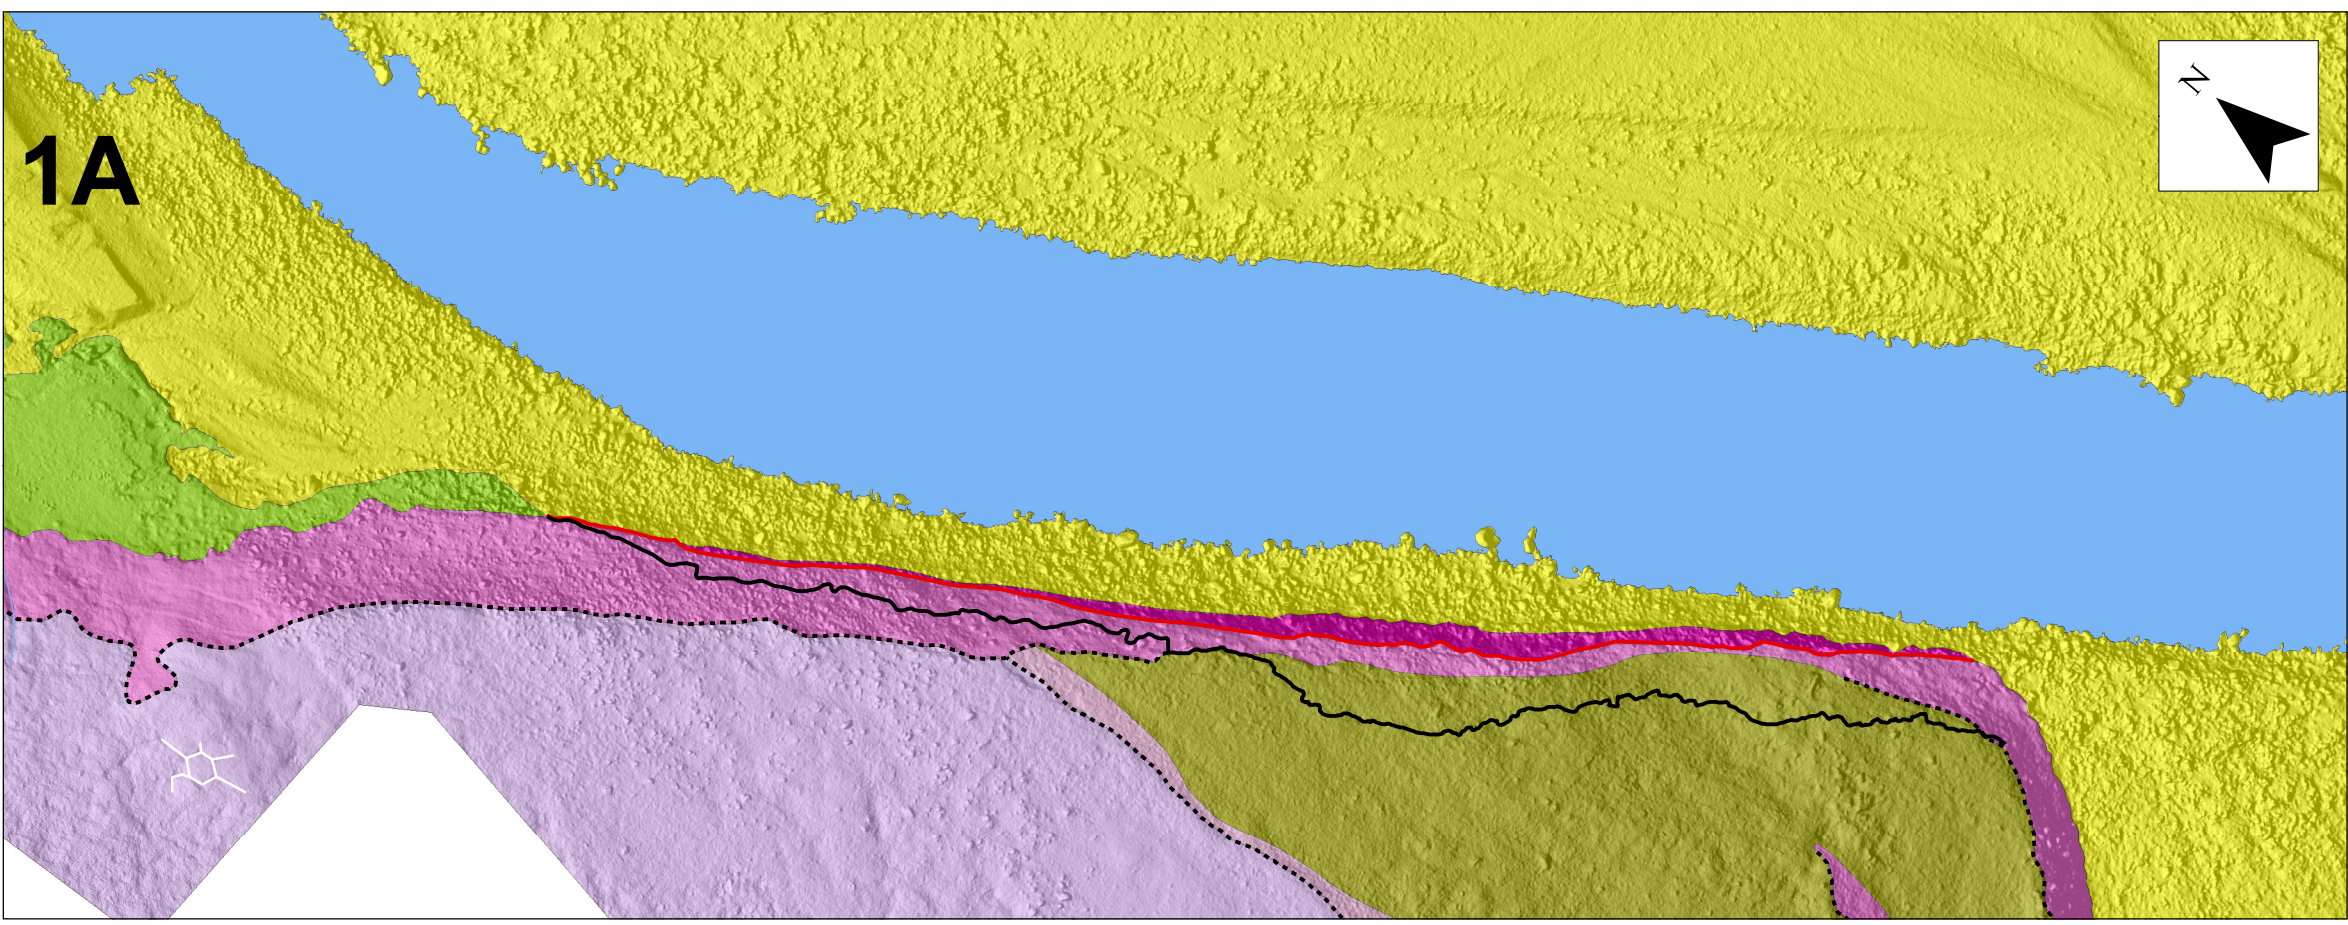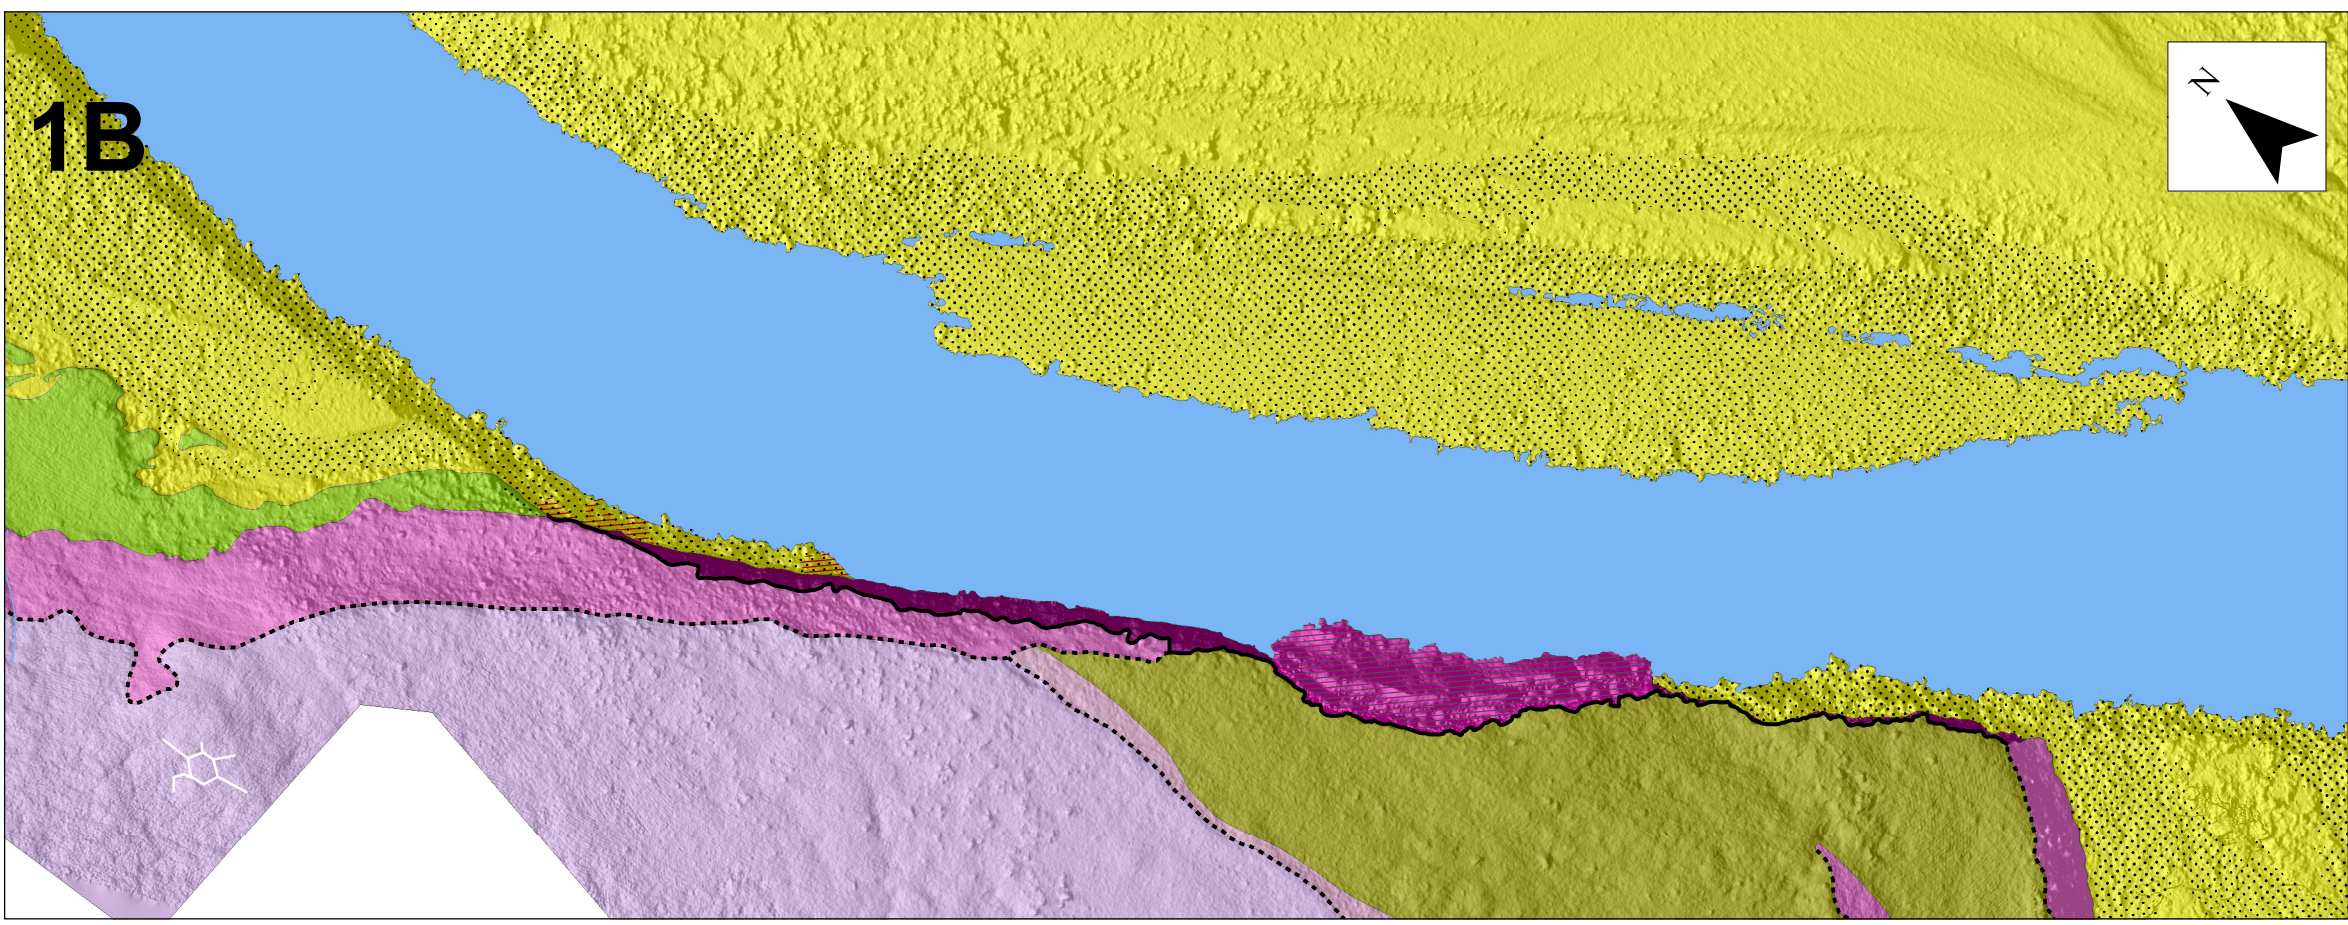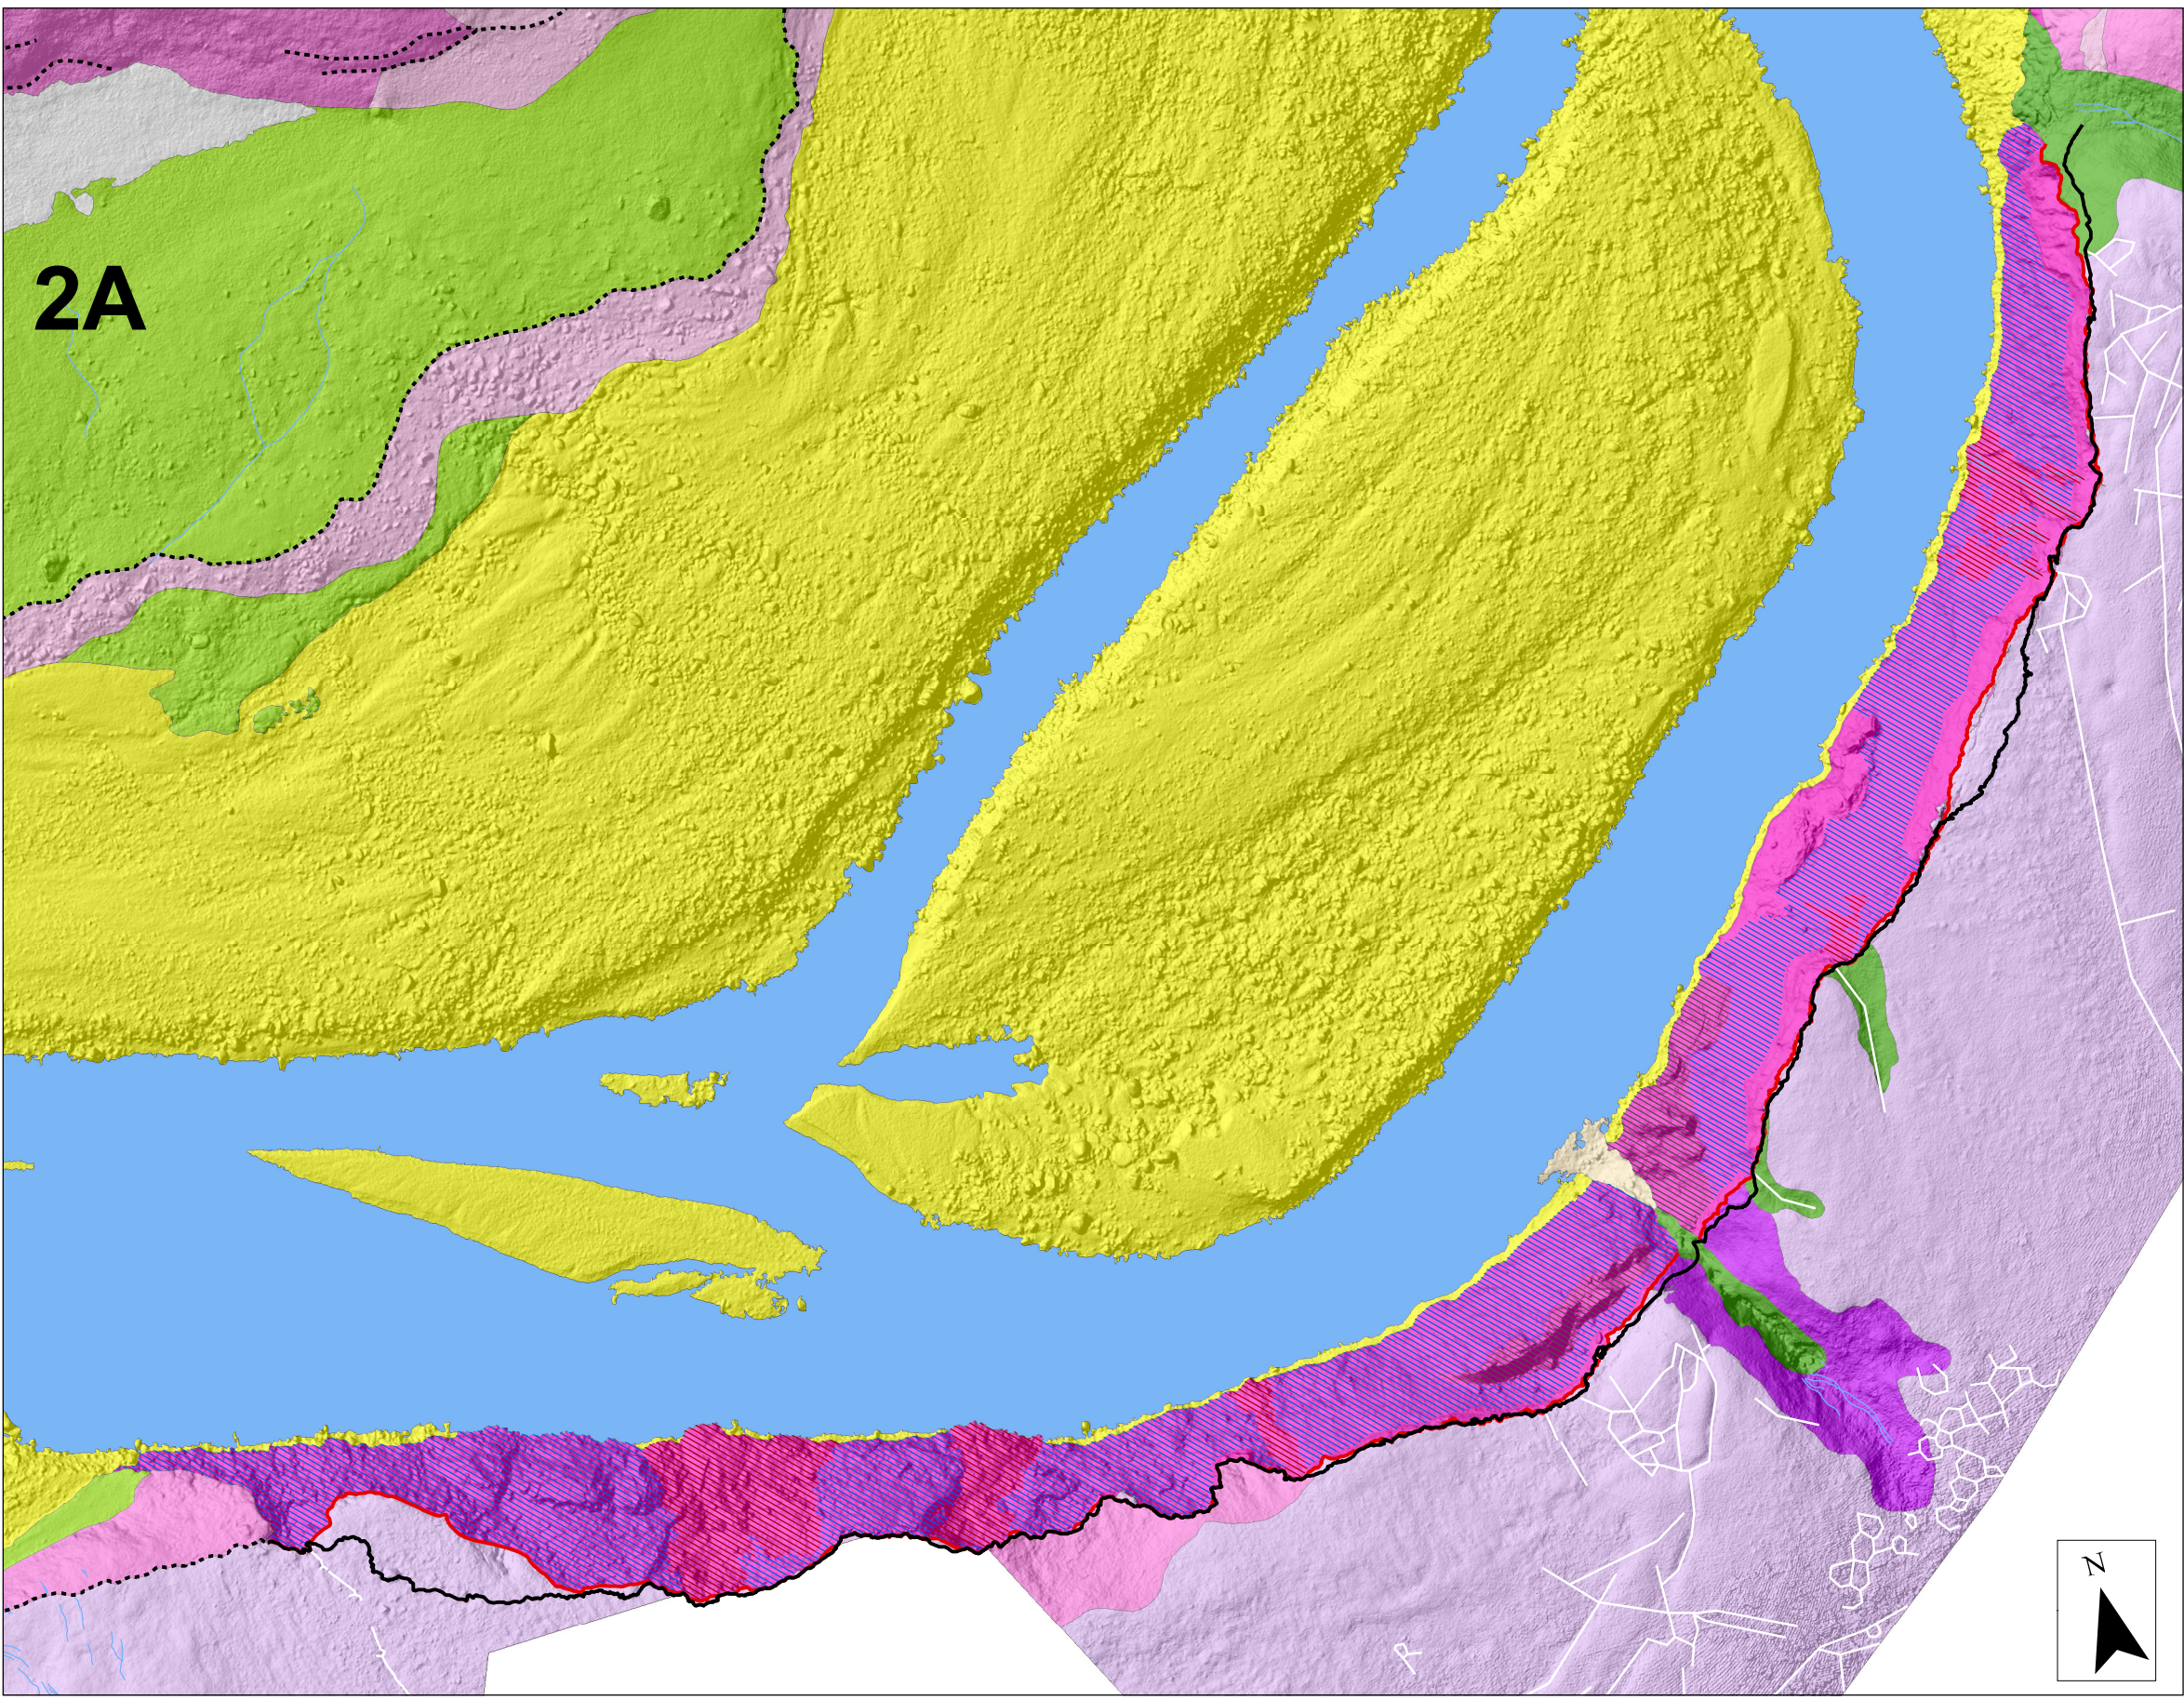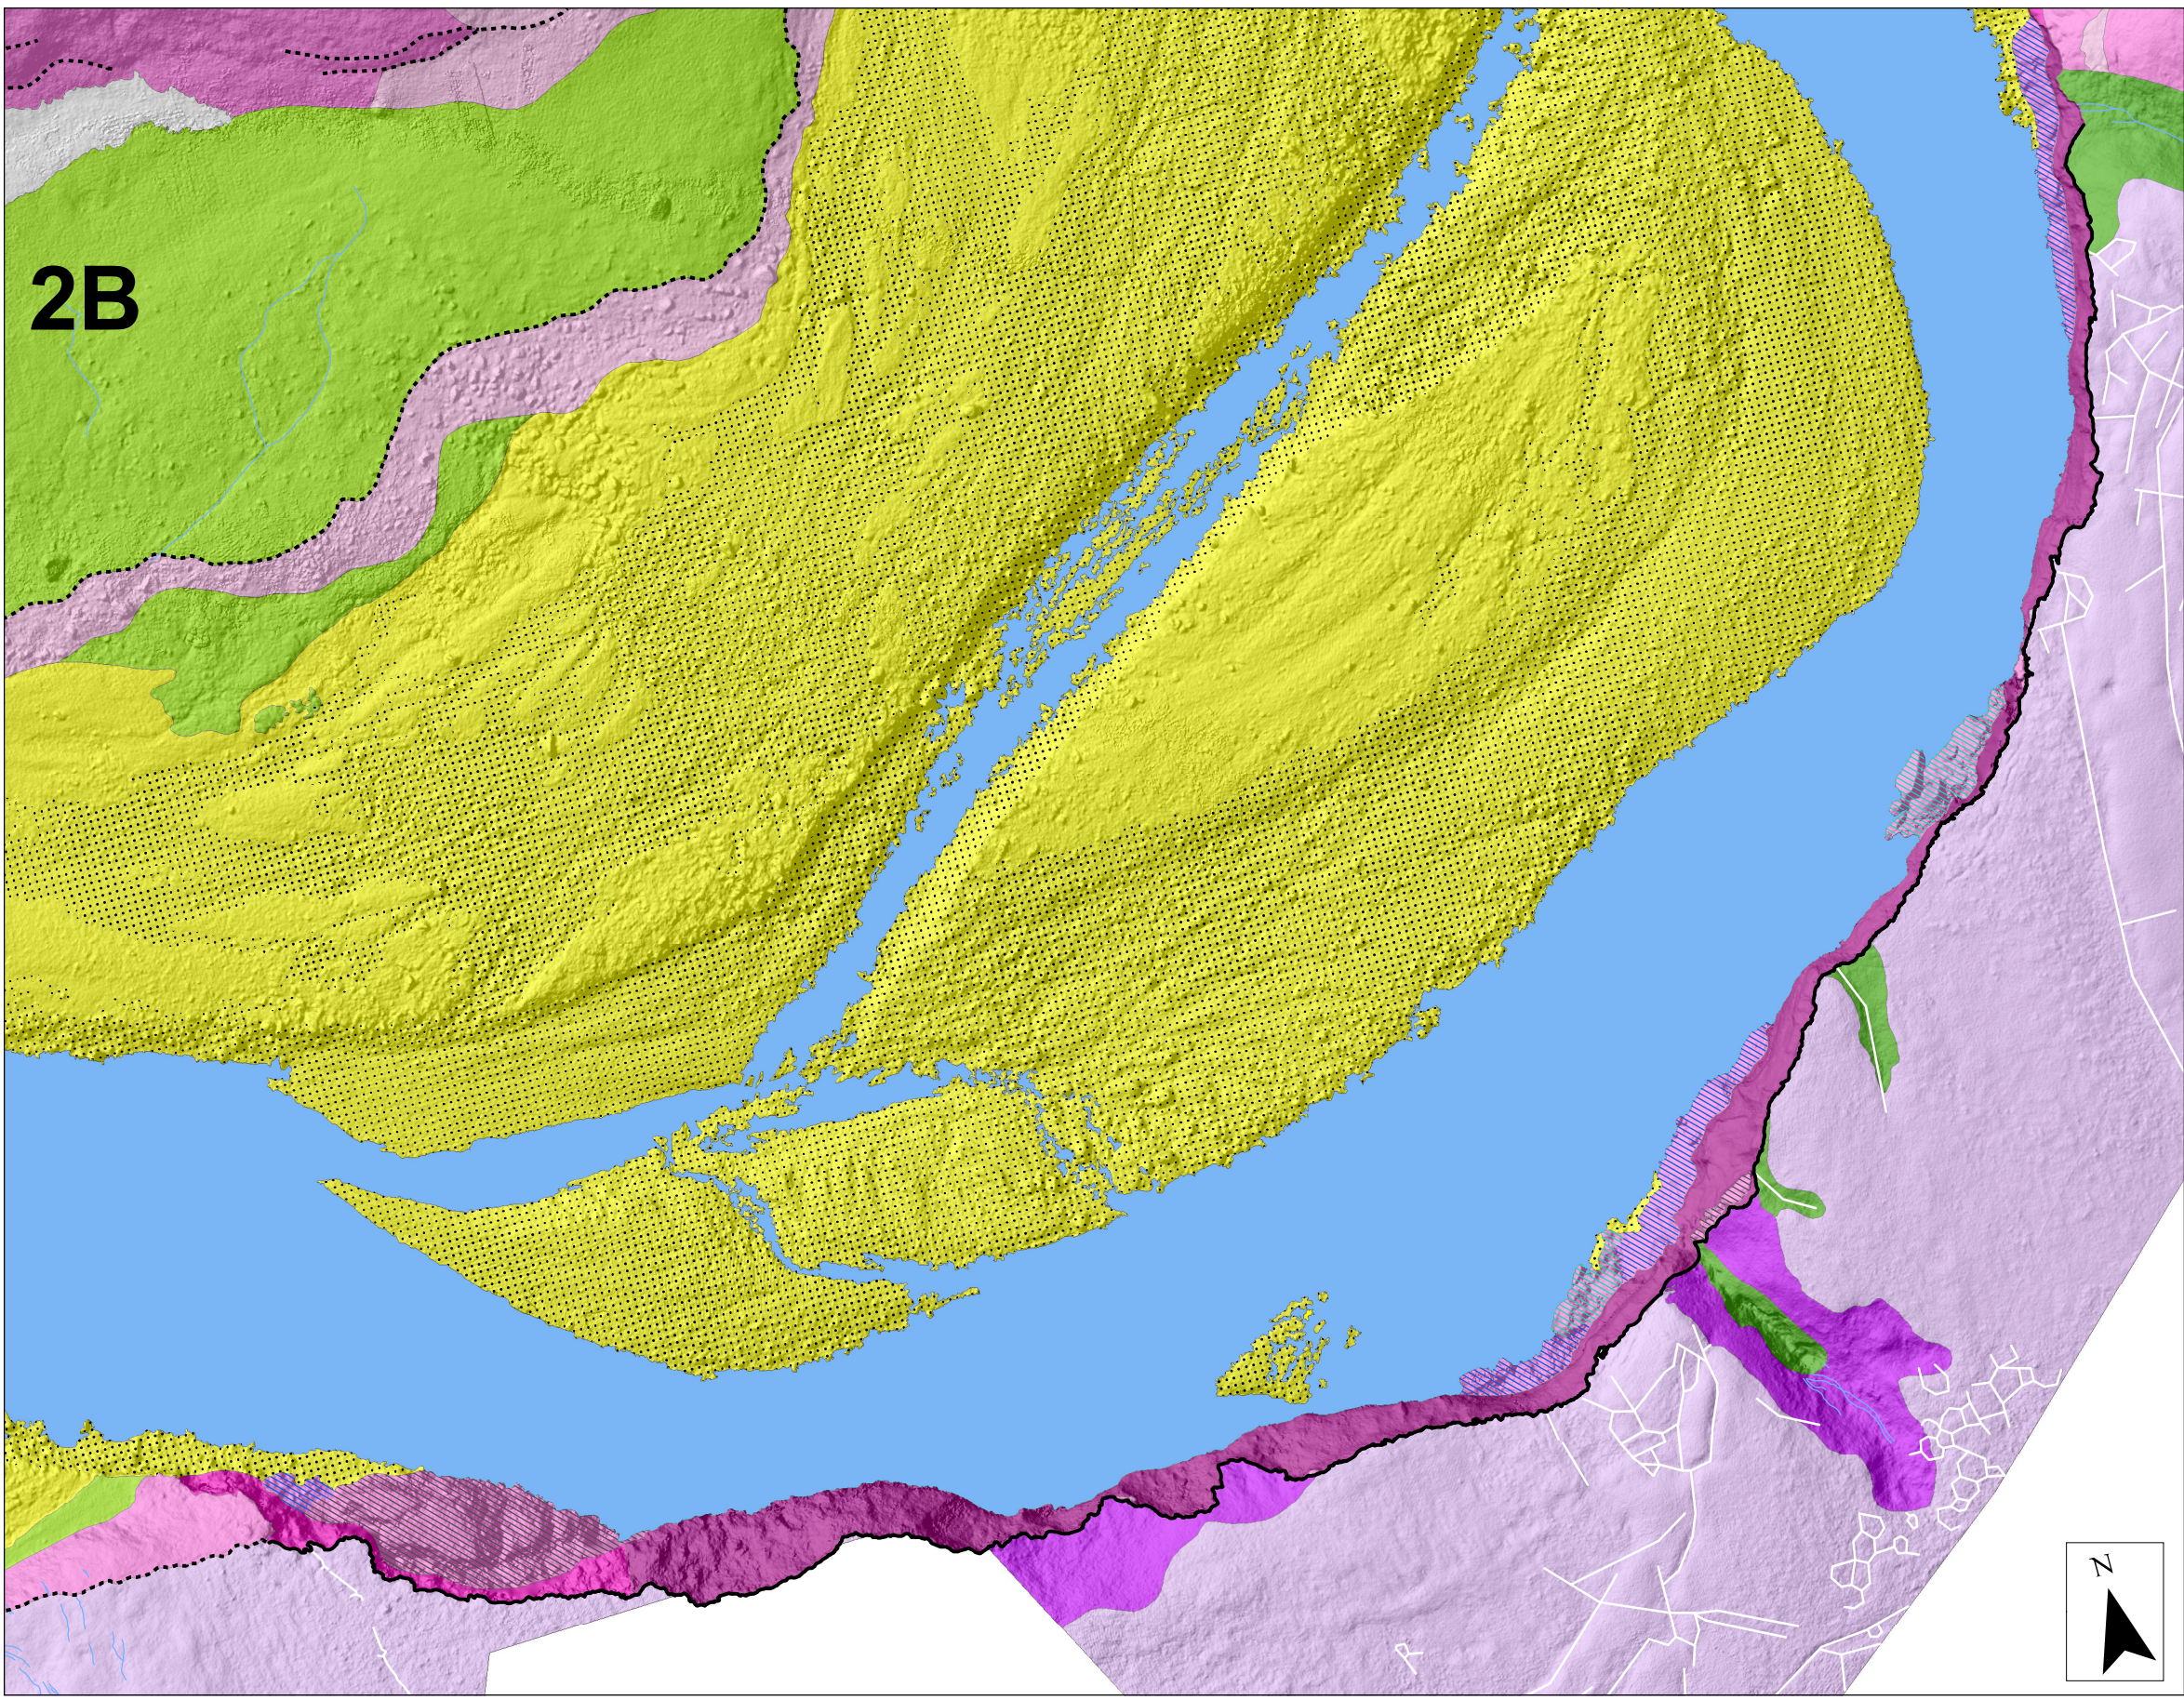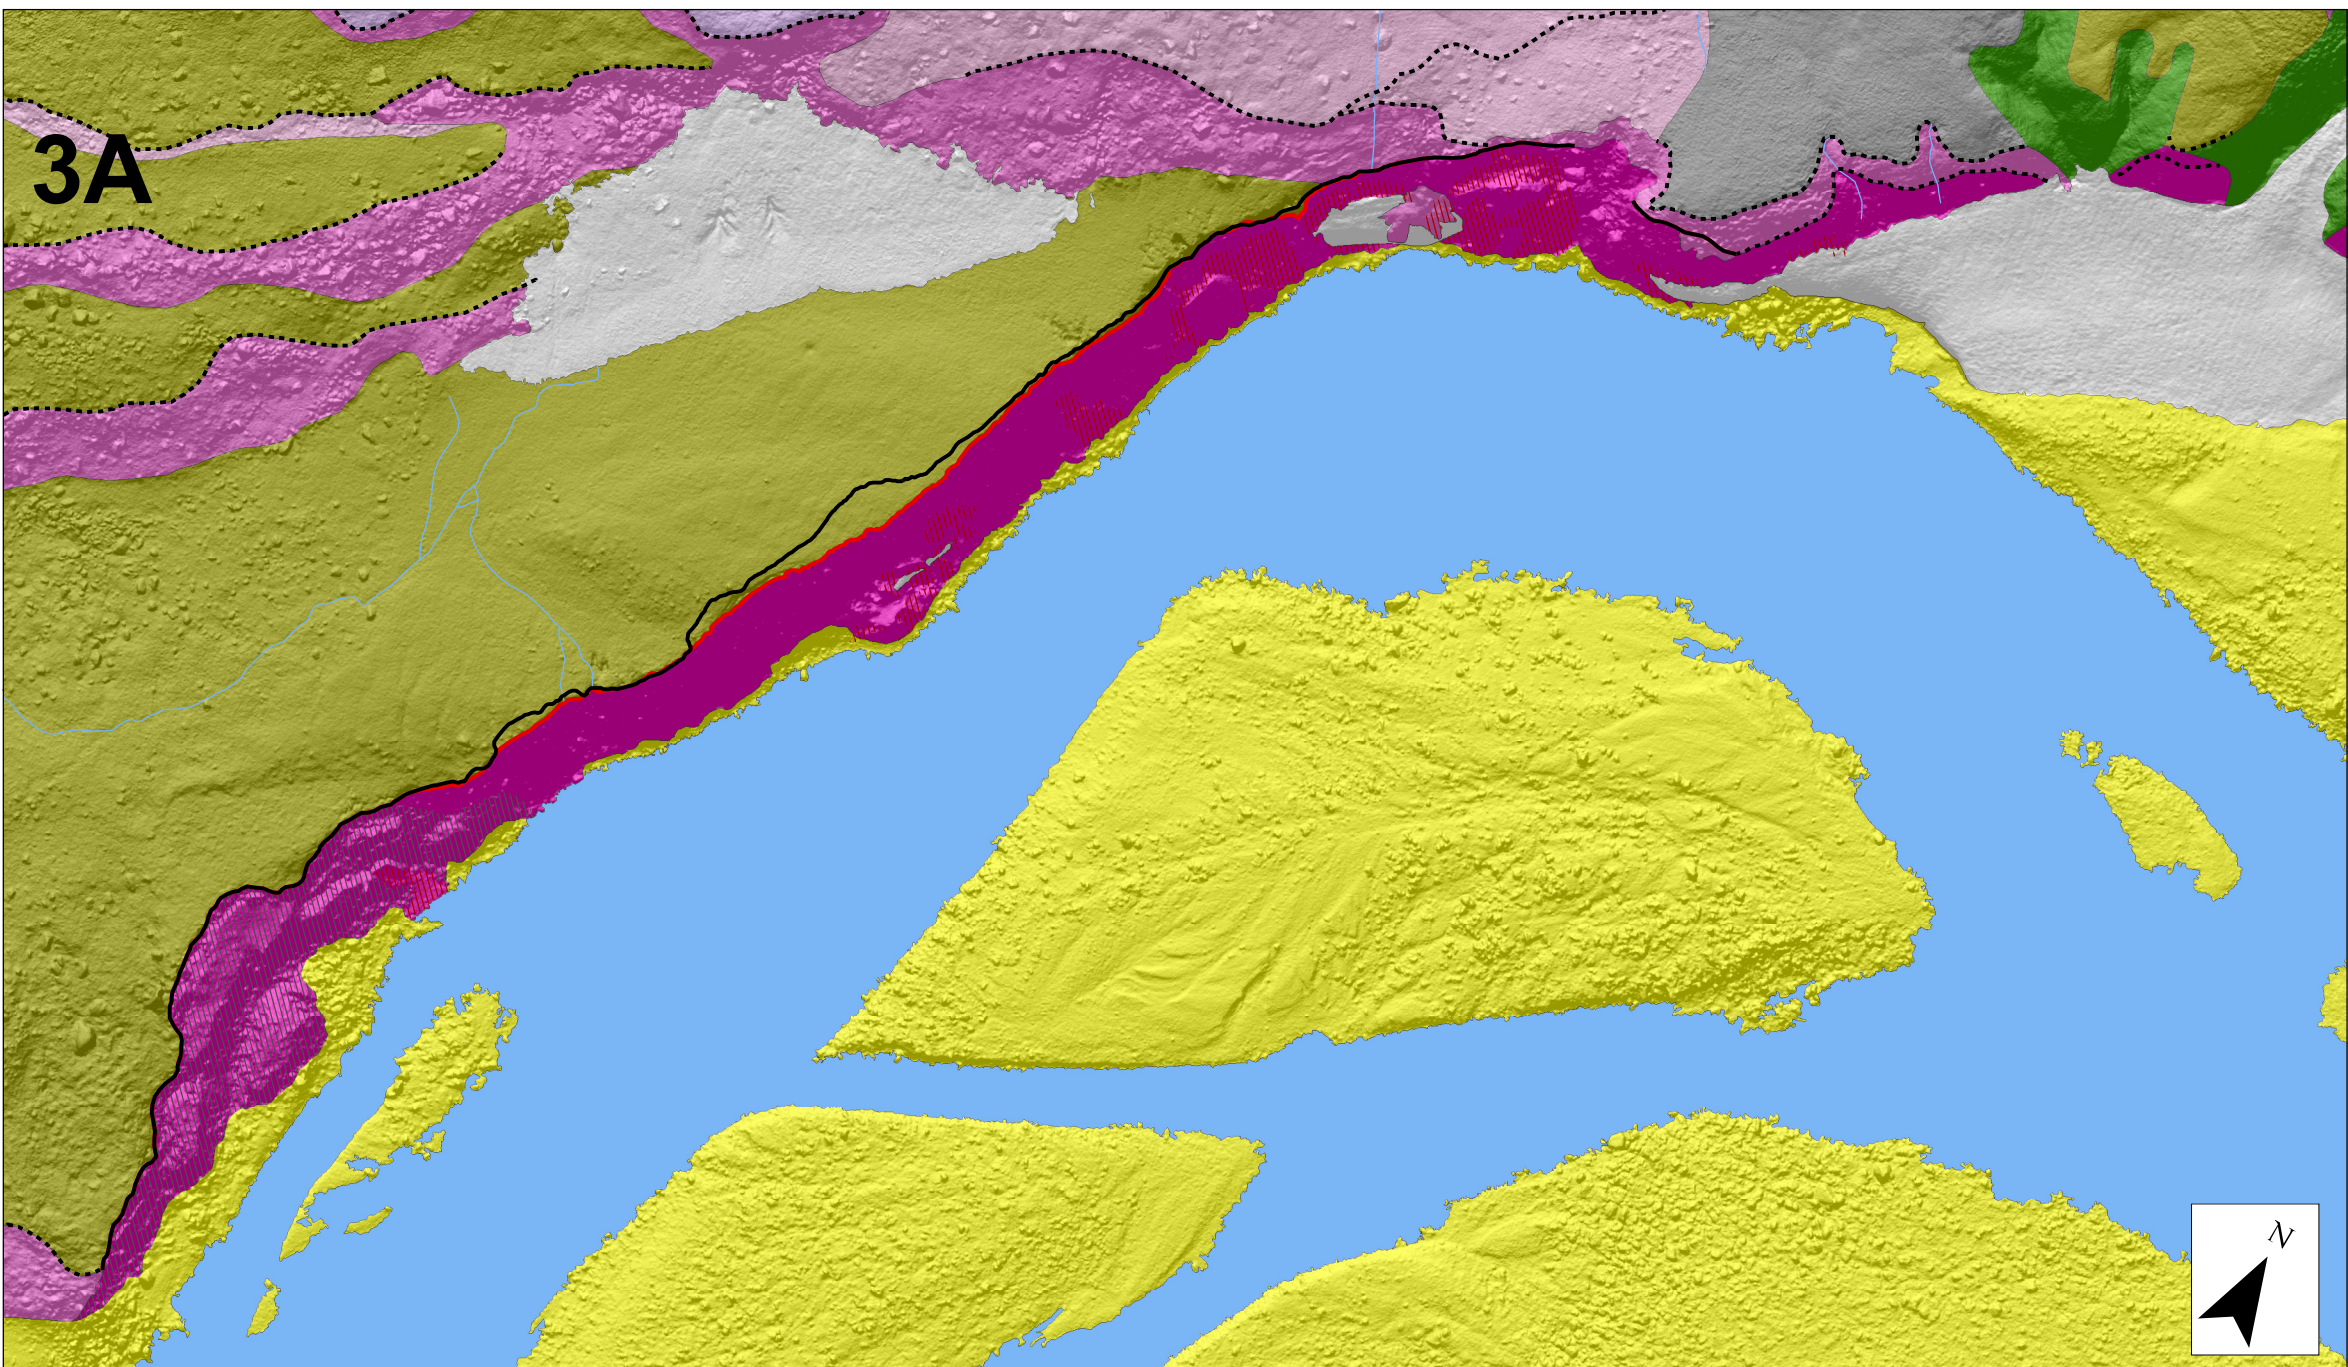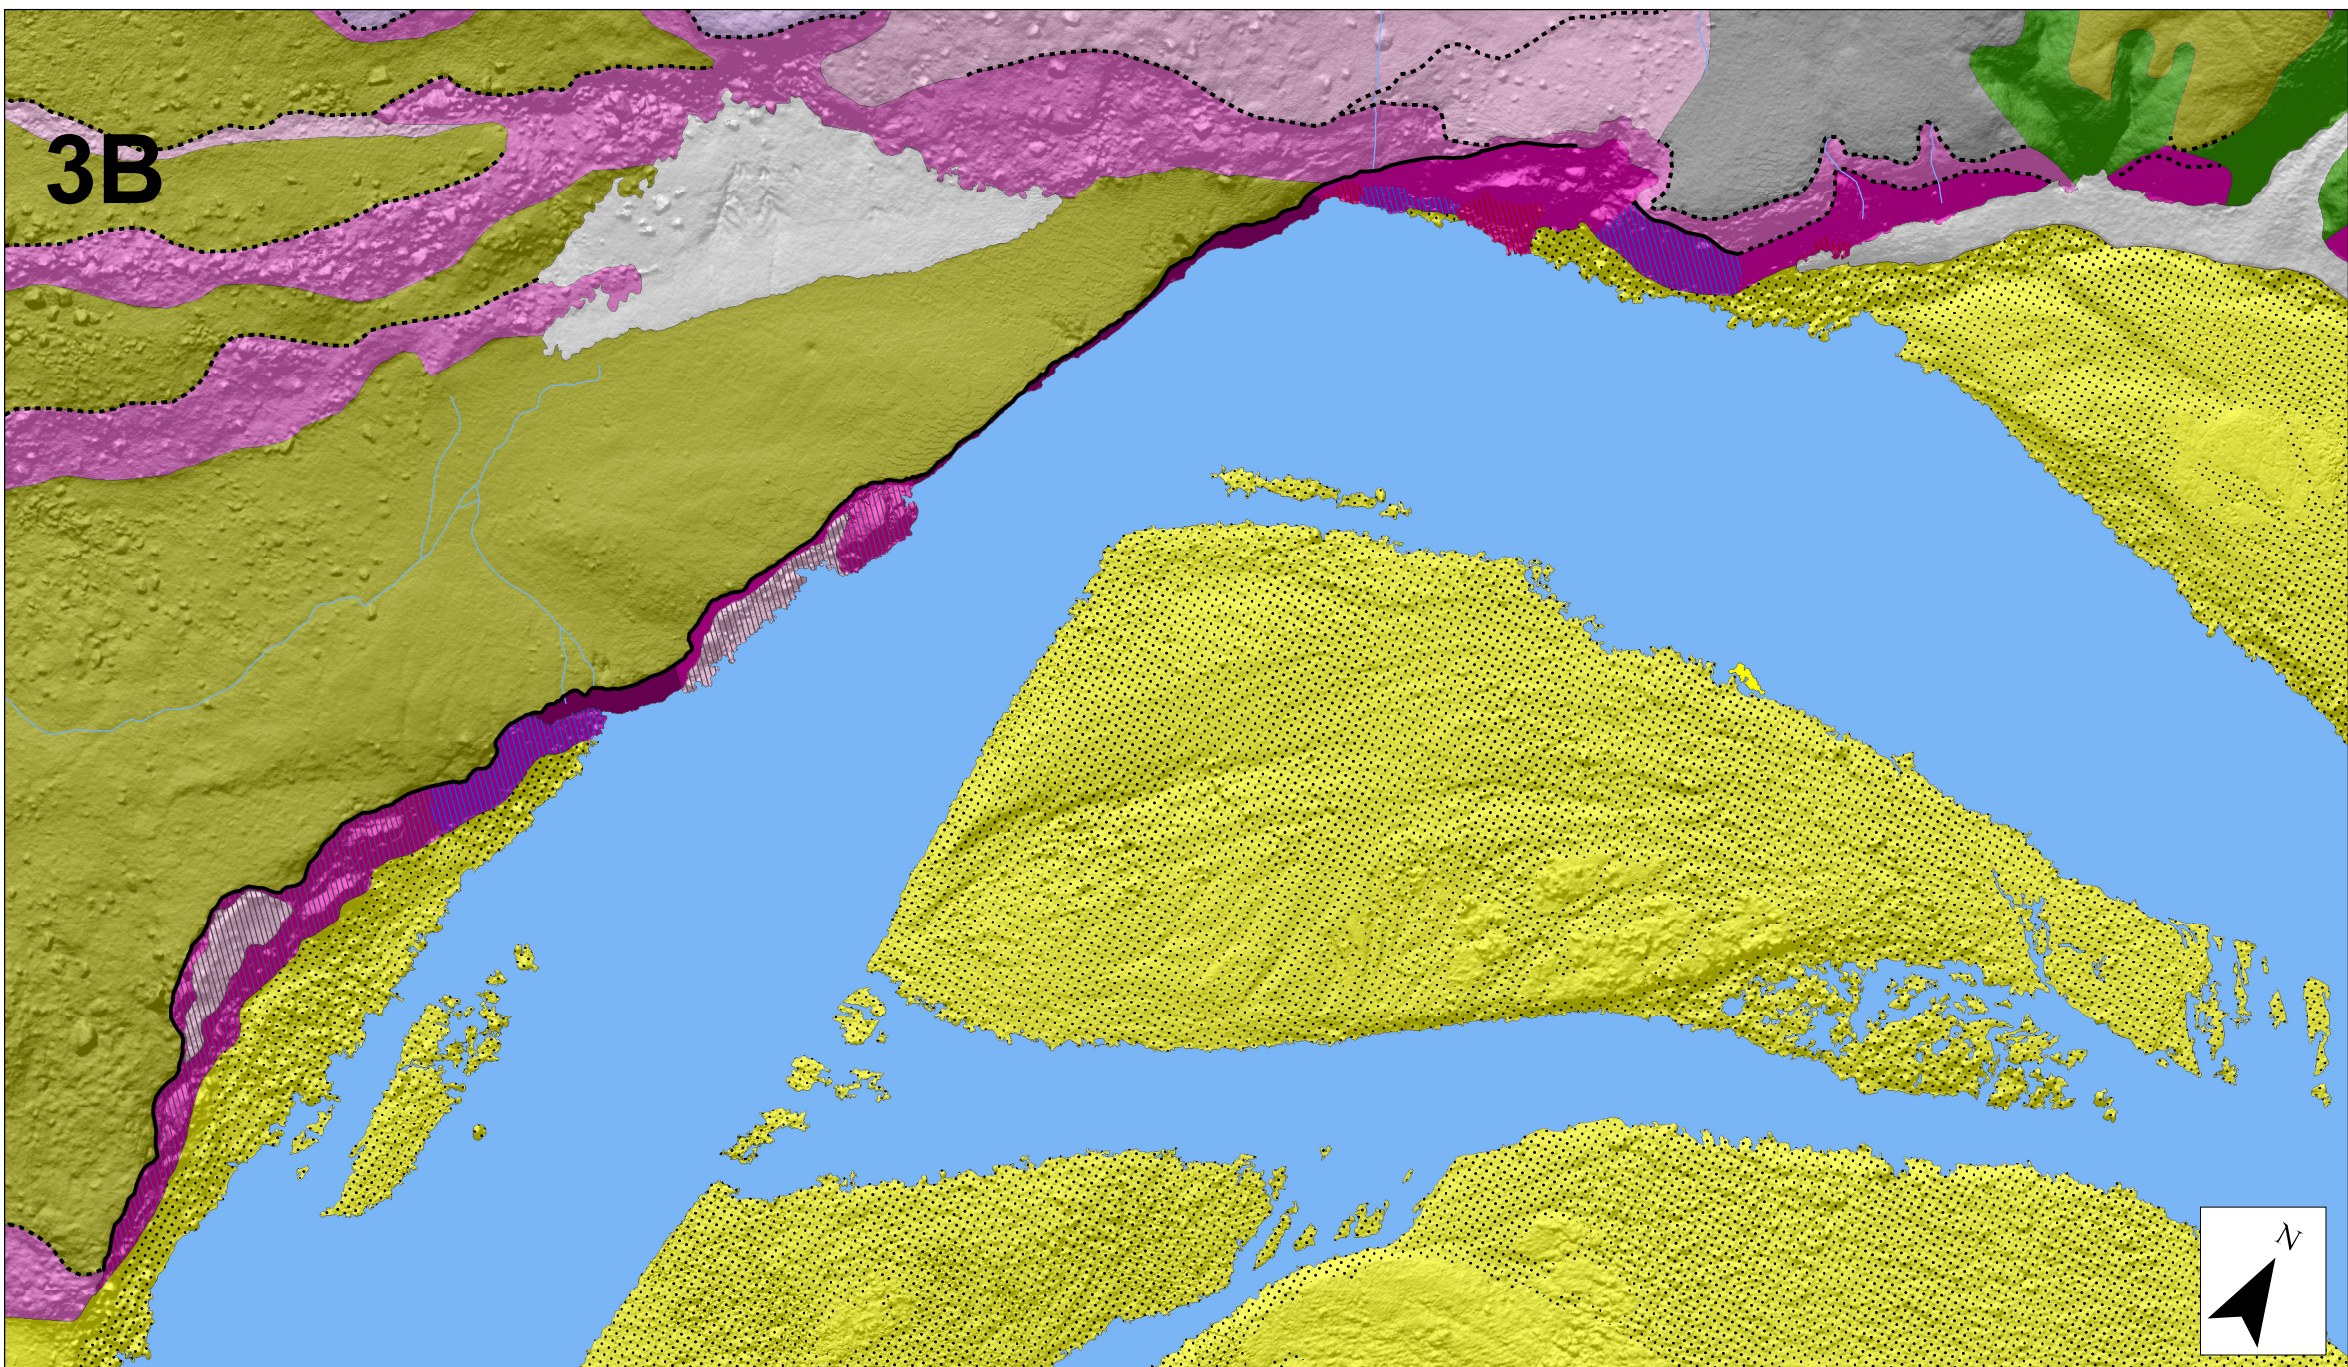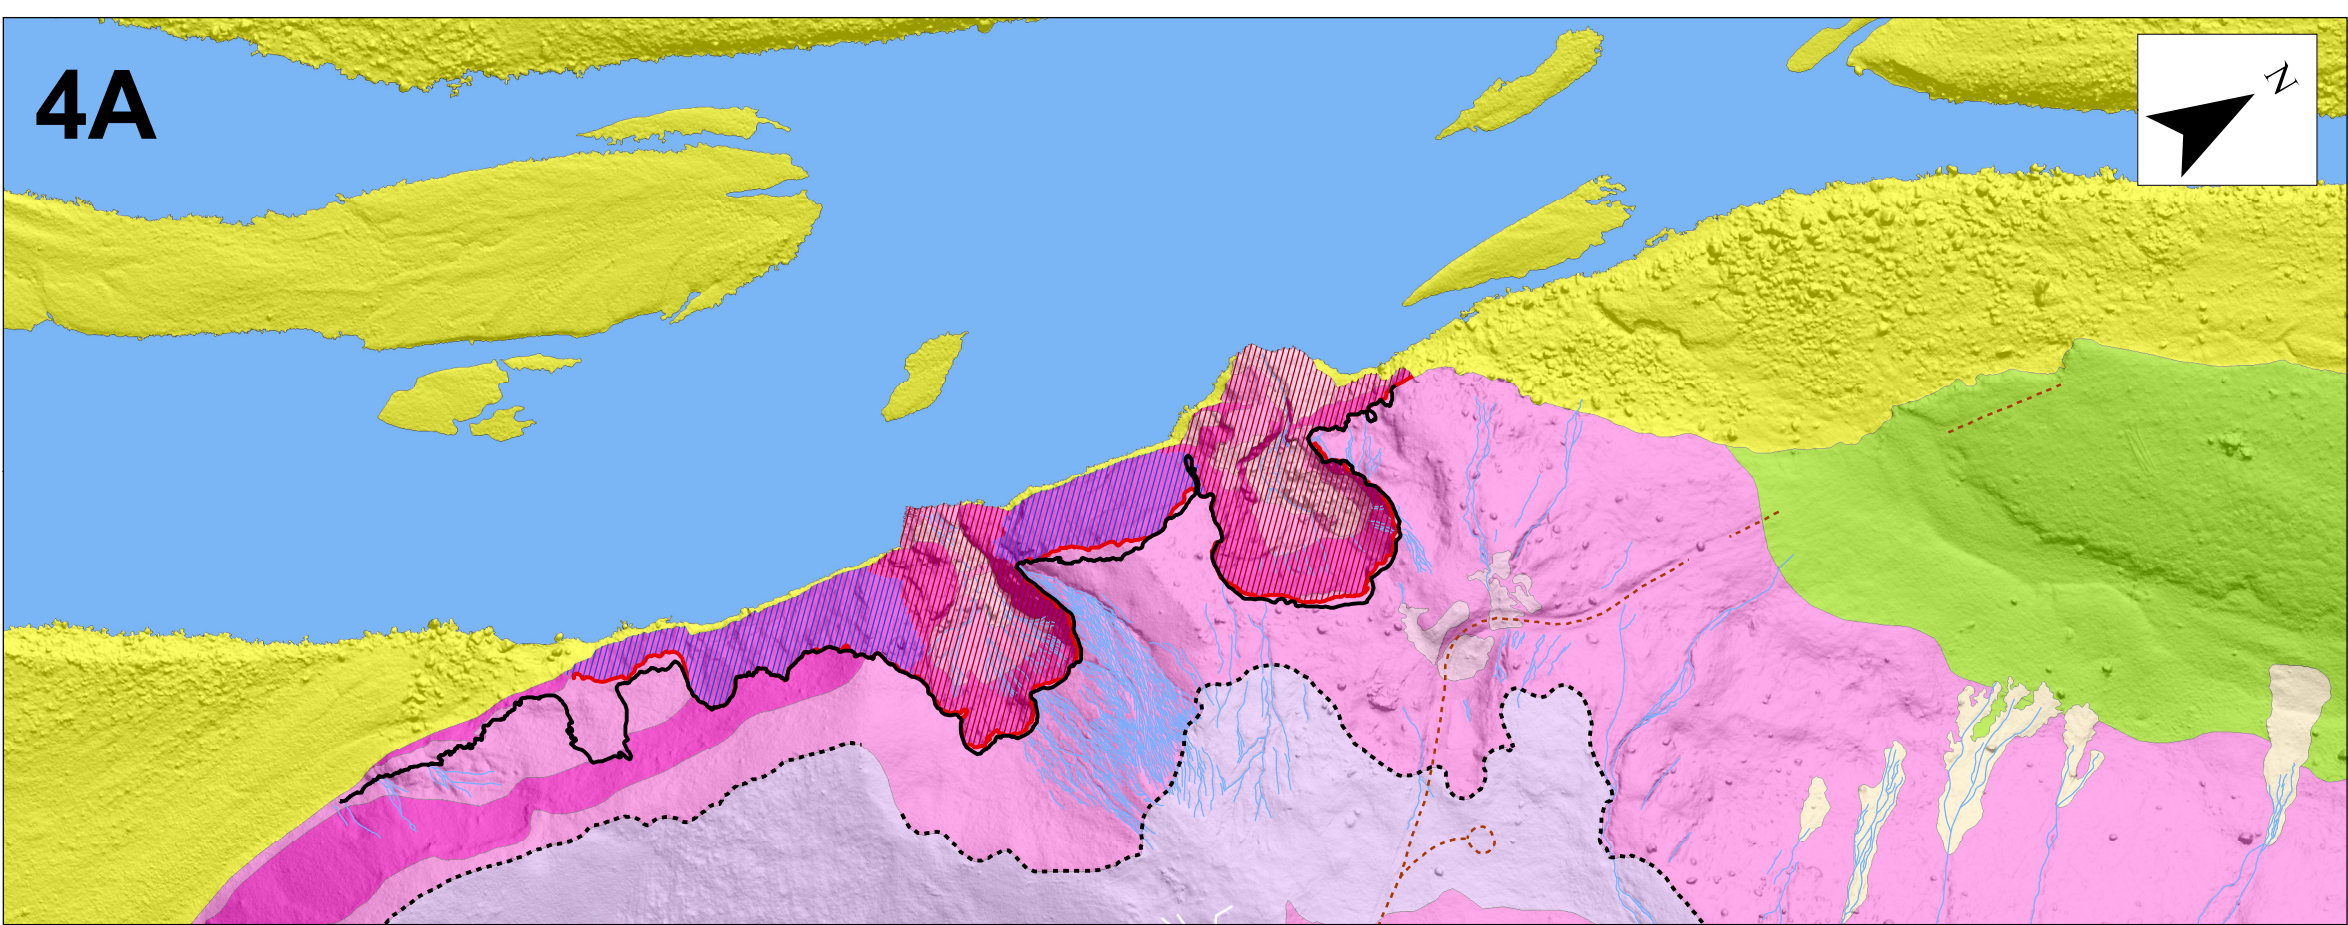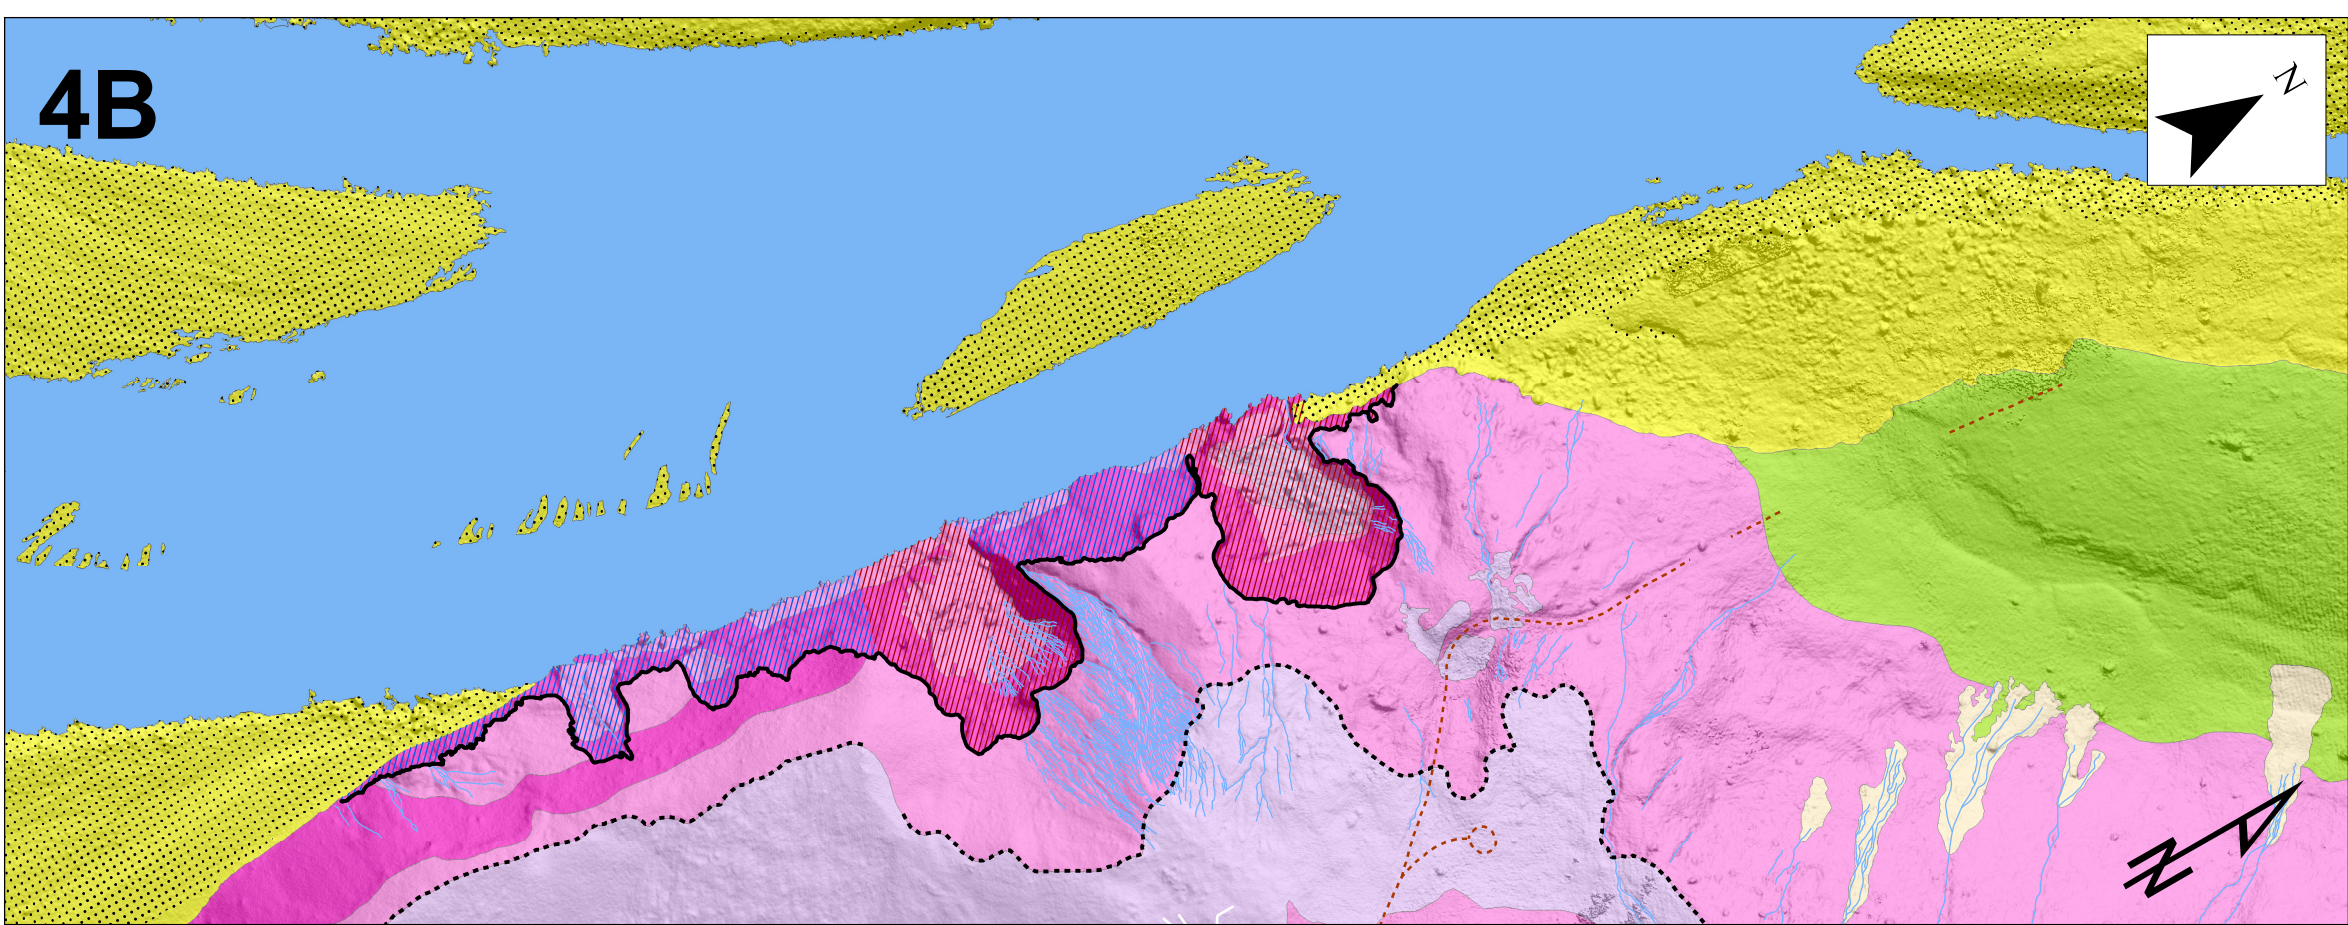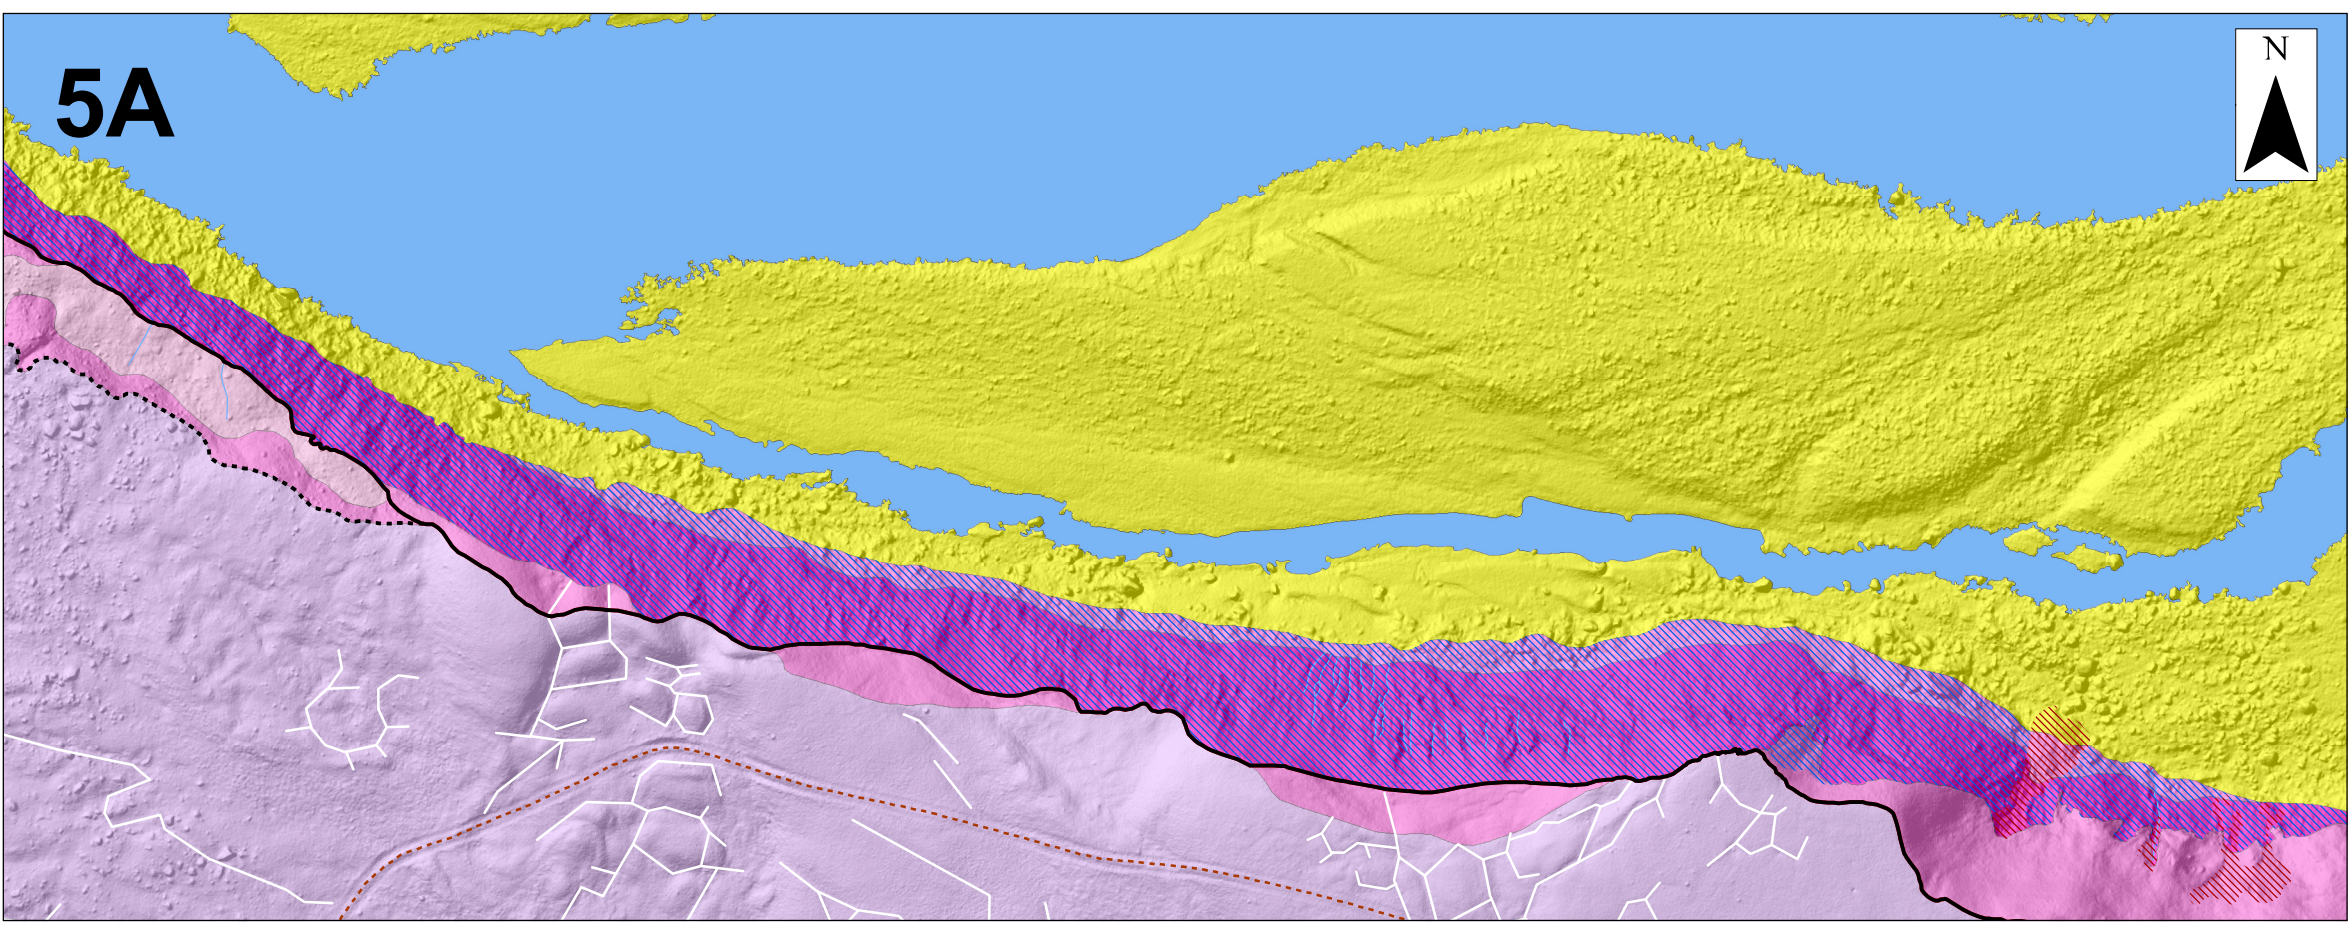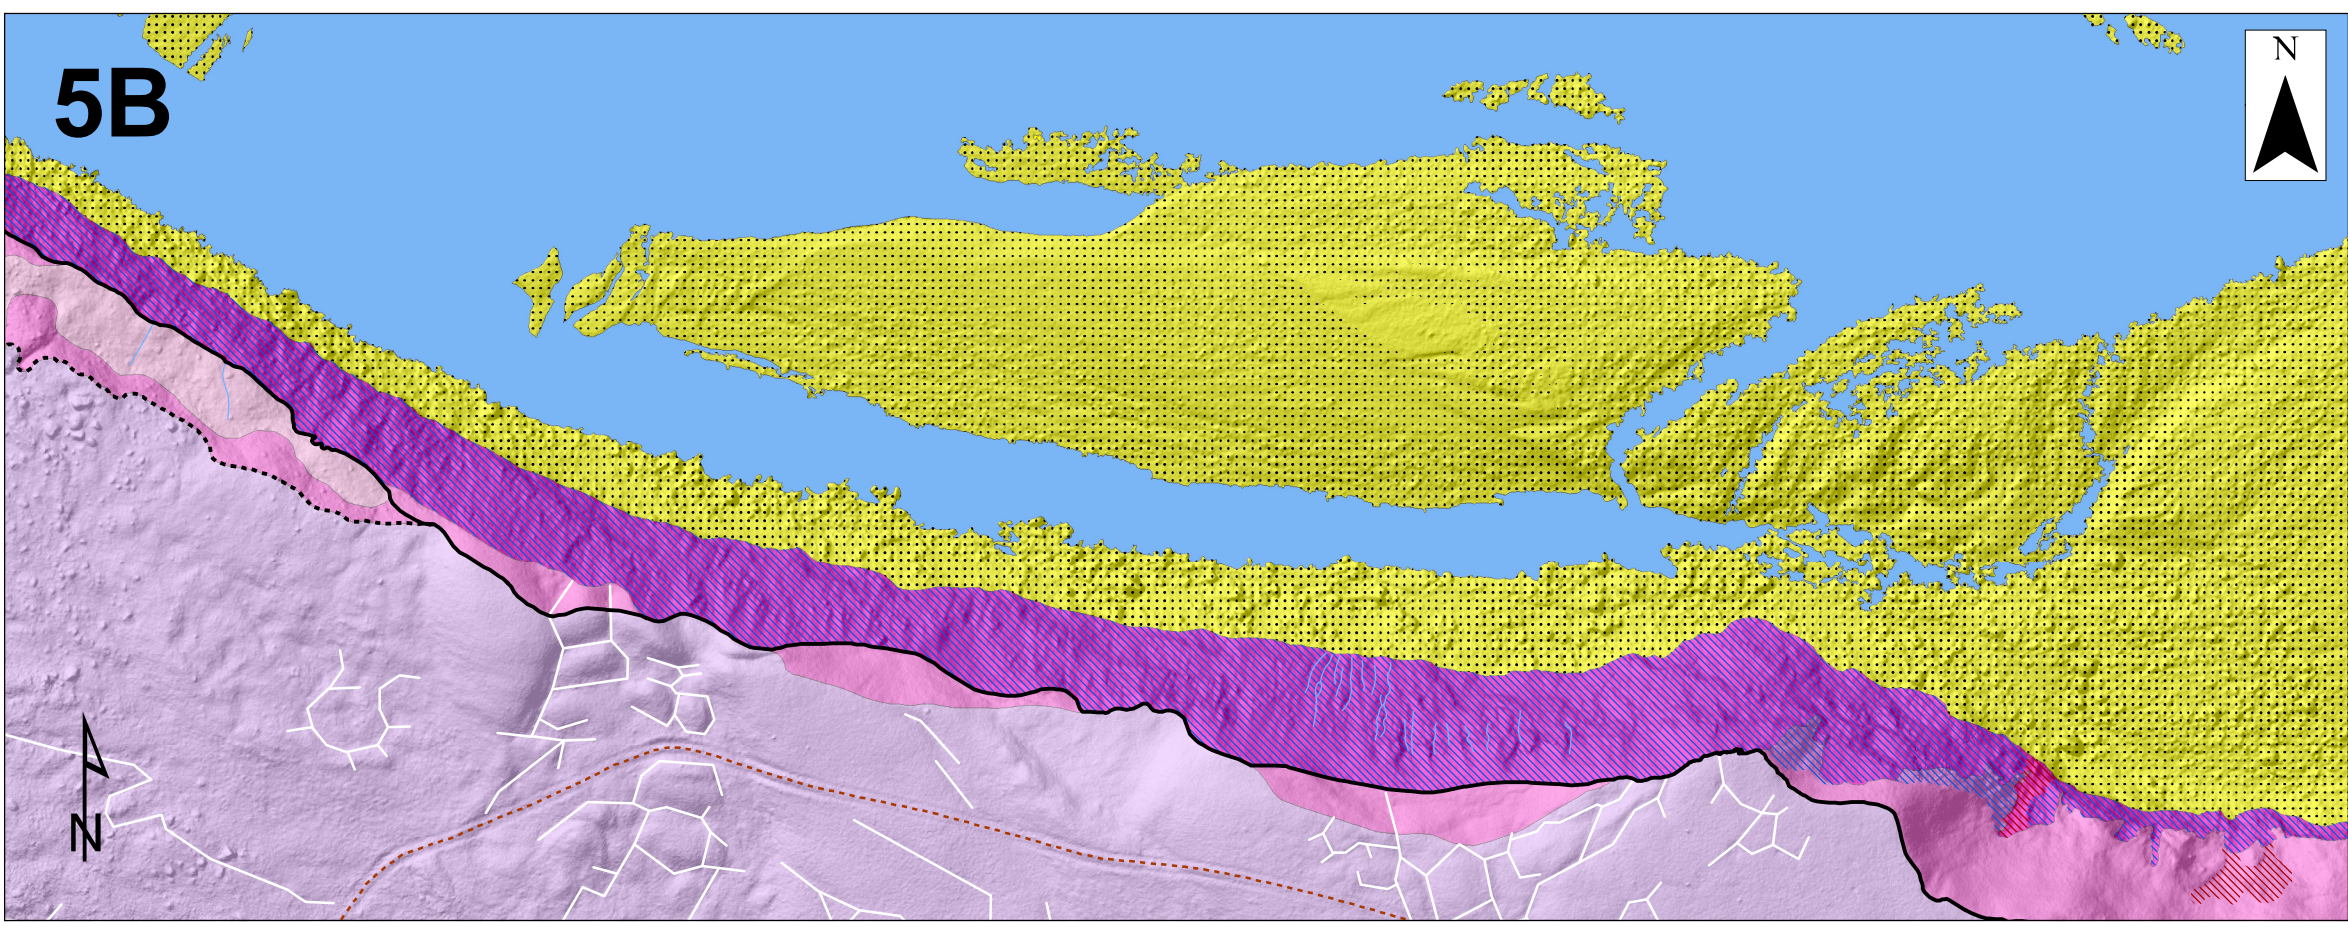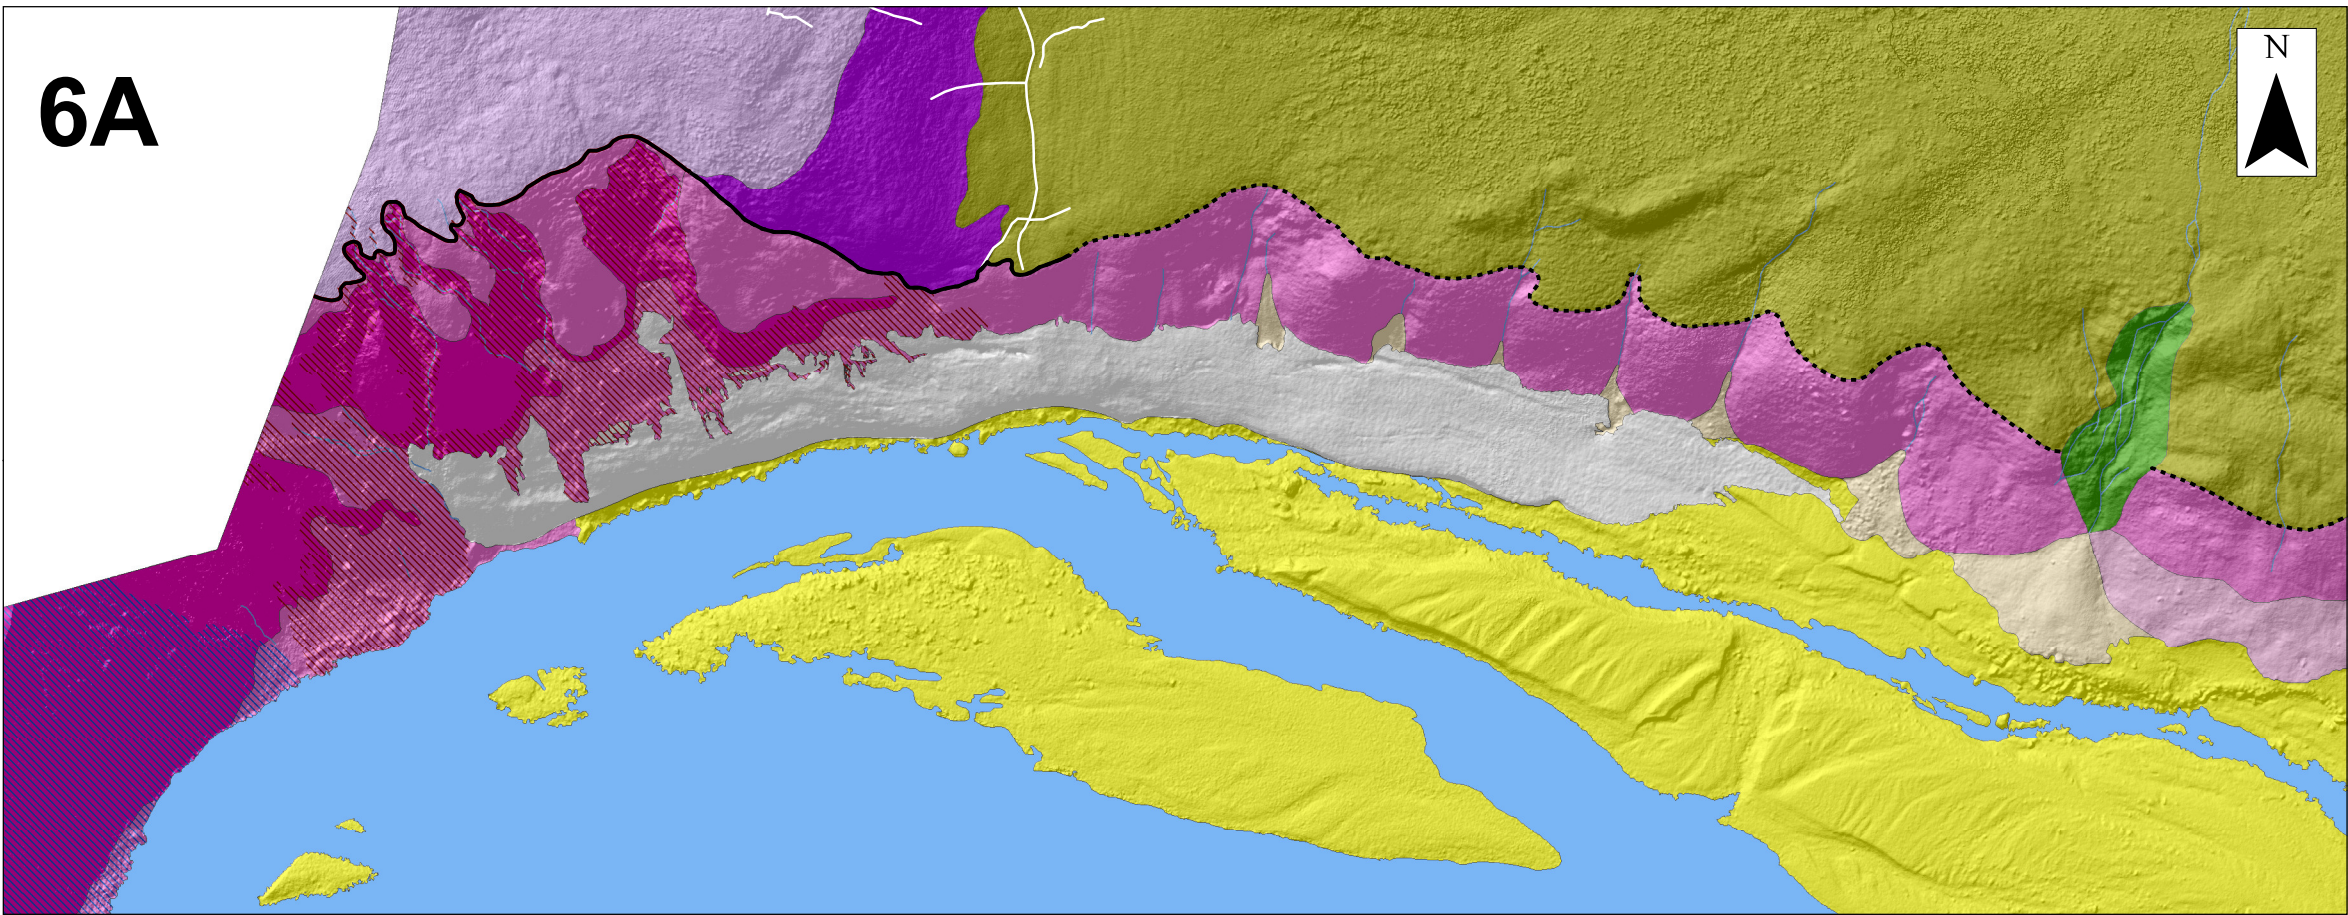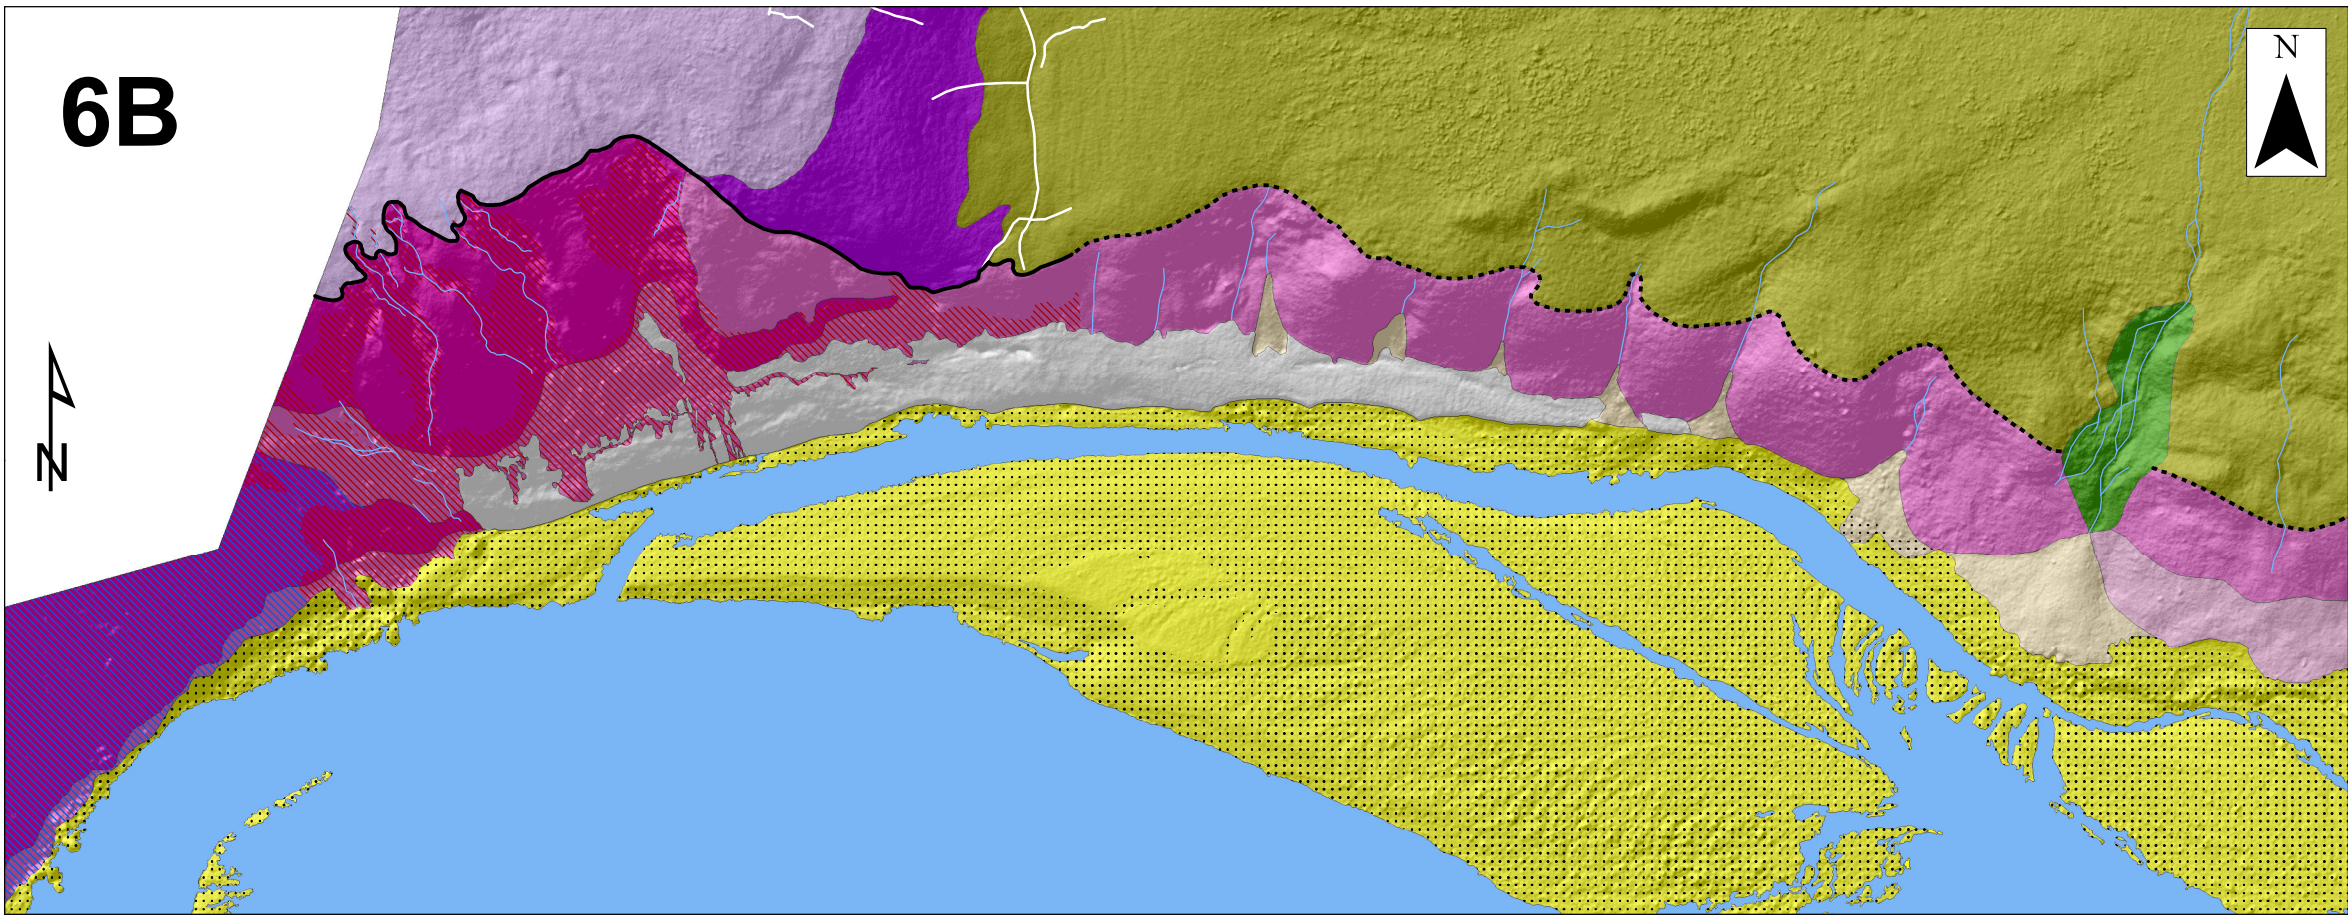

1:800  
(when printed in A0)

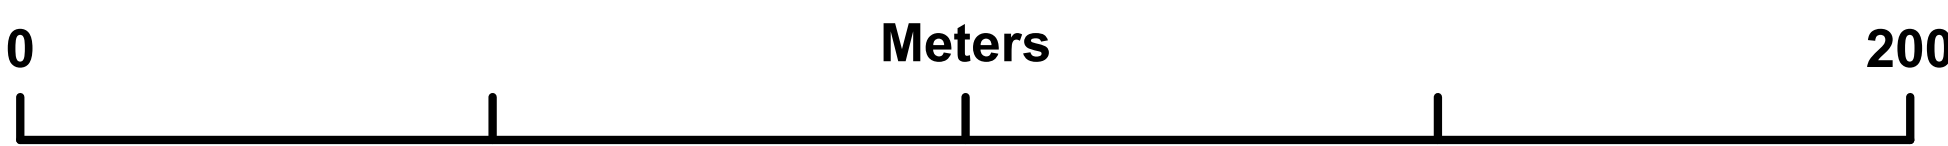

Projection: UTM zone 27N / WGS 1984; Map based on an orthophoto and digital elevation model generated from Unmanned Airborne Vehicle photographs. Map to accompany paper: A.M. Tomczyk and M.W. Ewertowski: UAV-based remote sensing of immediate changes in geomorphology following a glacial lake outburst flood, Zackenberg River, Northeast Greenland.
