# Supplementary material
Source: publisher figshare collection journal article supplement (https://tandf.figshare.com/articles/dataset/_/12108642)
Supplement: Supplementary file 2 [file 1]

# Main Map 1: UAV-based remote sensing of immediate changes in geomorphology following a glacial lake outburst flood, Zackenberg River, Northeast Greenland

Aleksandra M. Tomczyk and Marek W. Ewertowski

Faculty of Geographical and Geological Sciences, Adam Mickiewicz University, Poznań, Poland

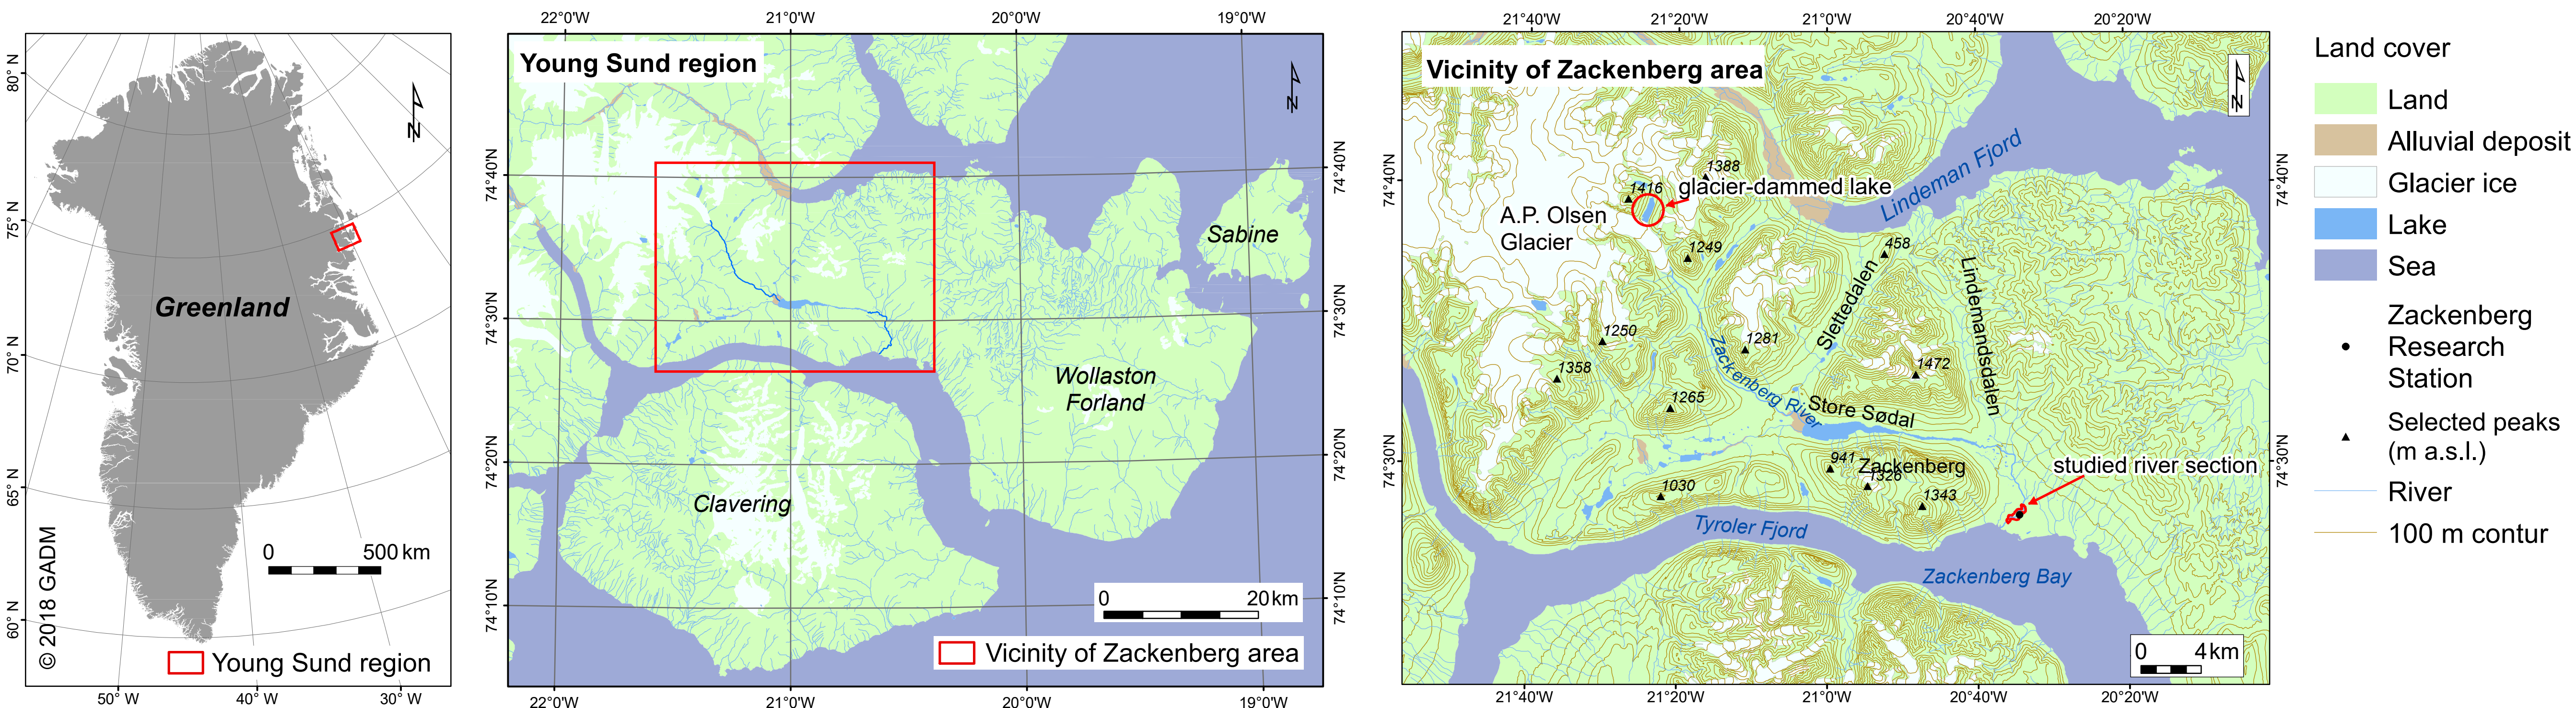

5 August 2017 - before flood

8 August 2017 - after flood

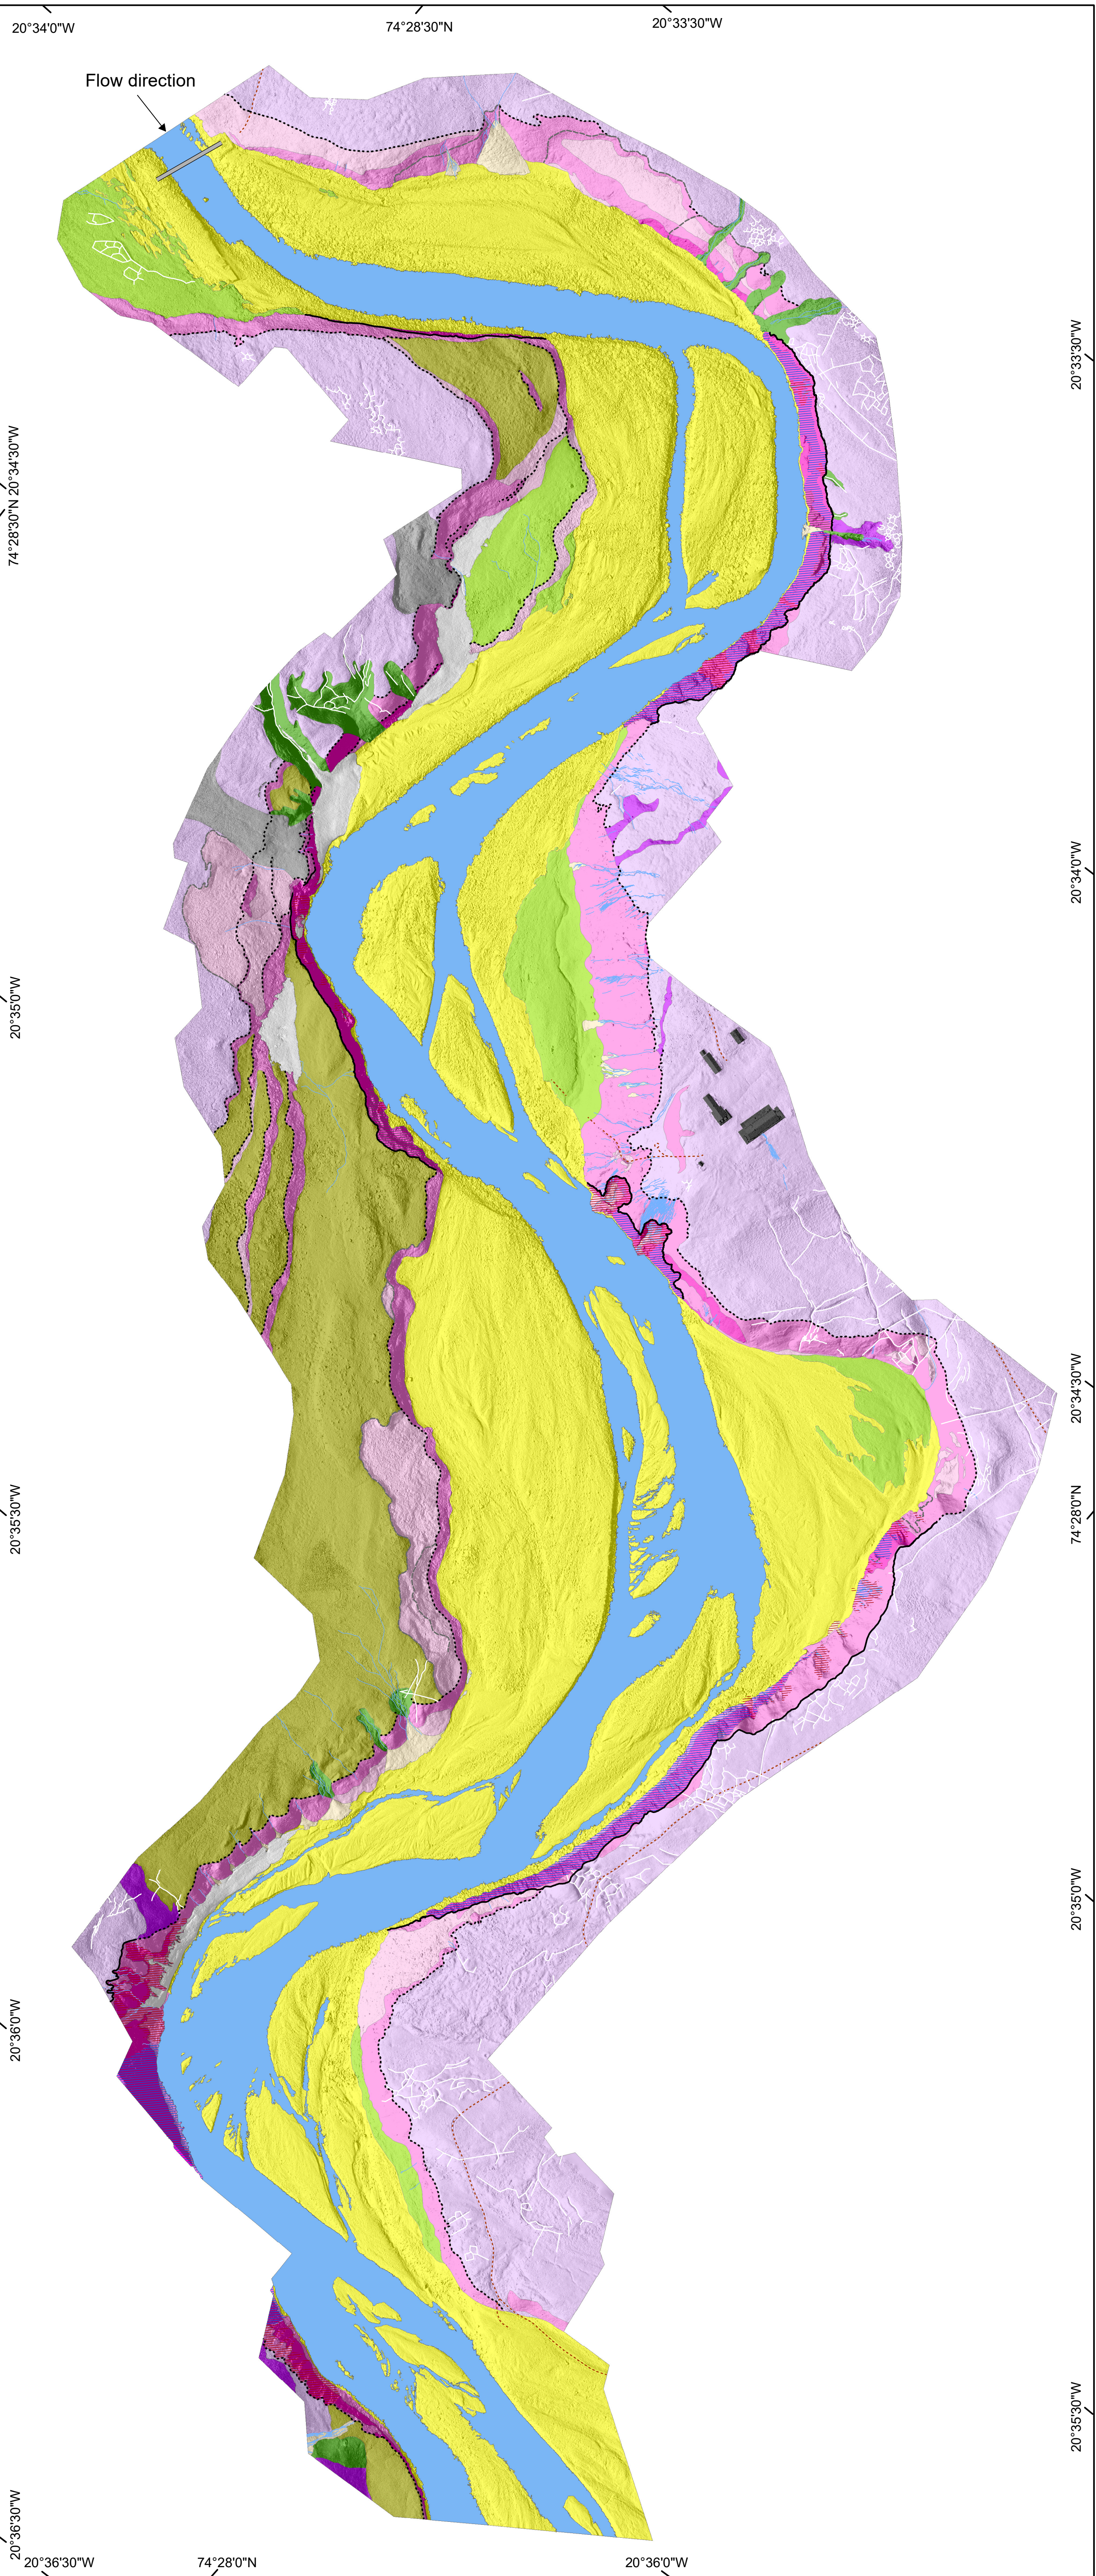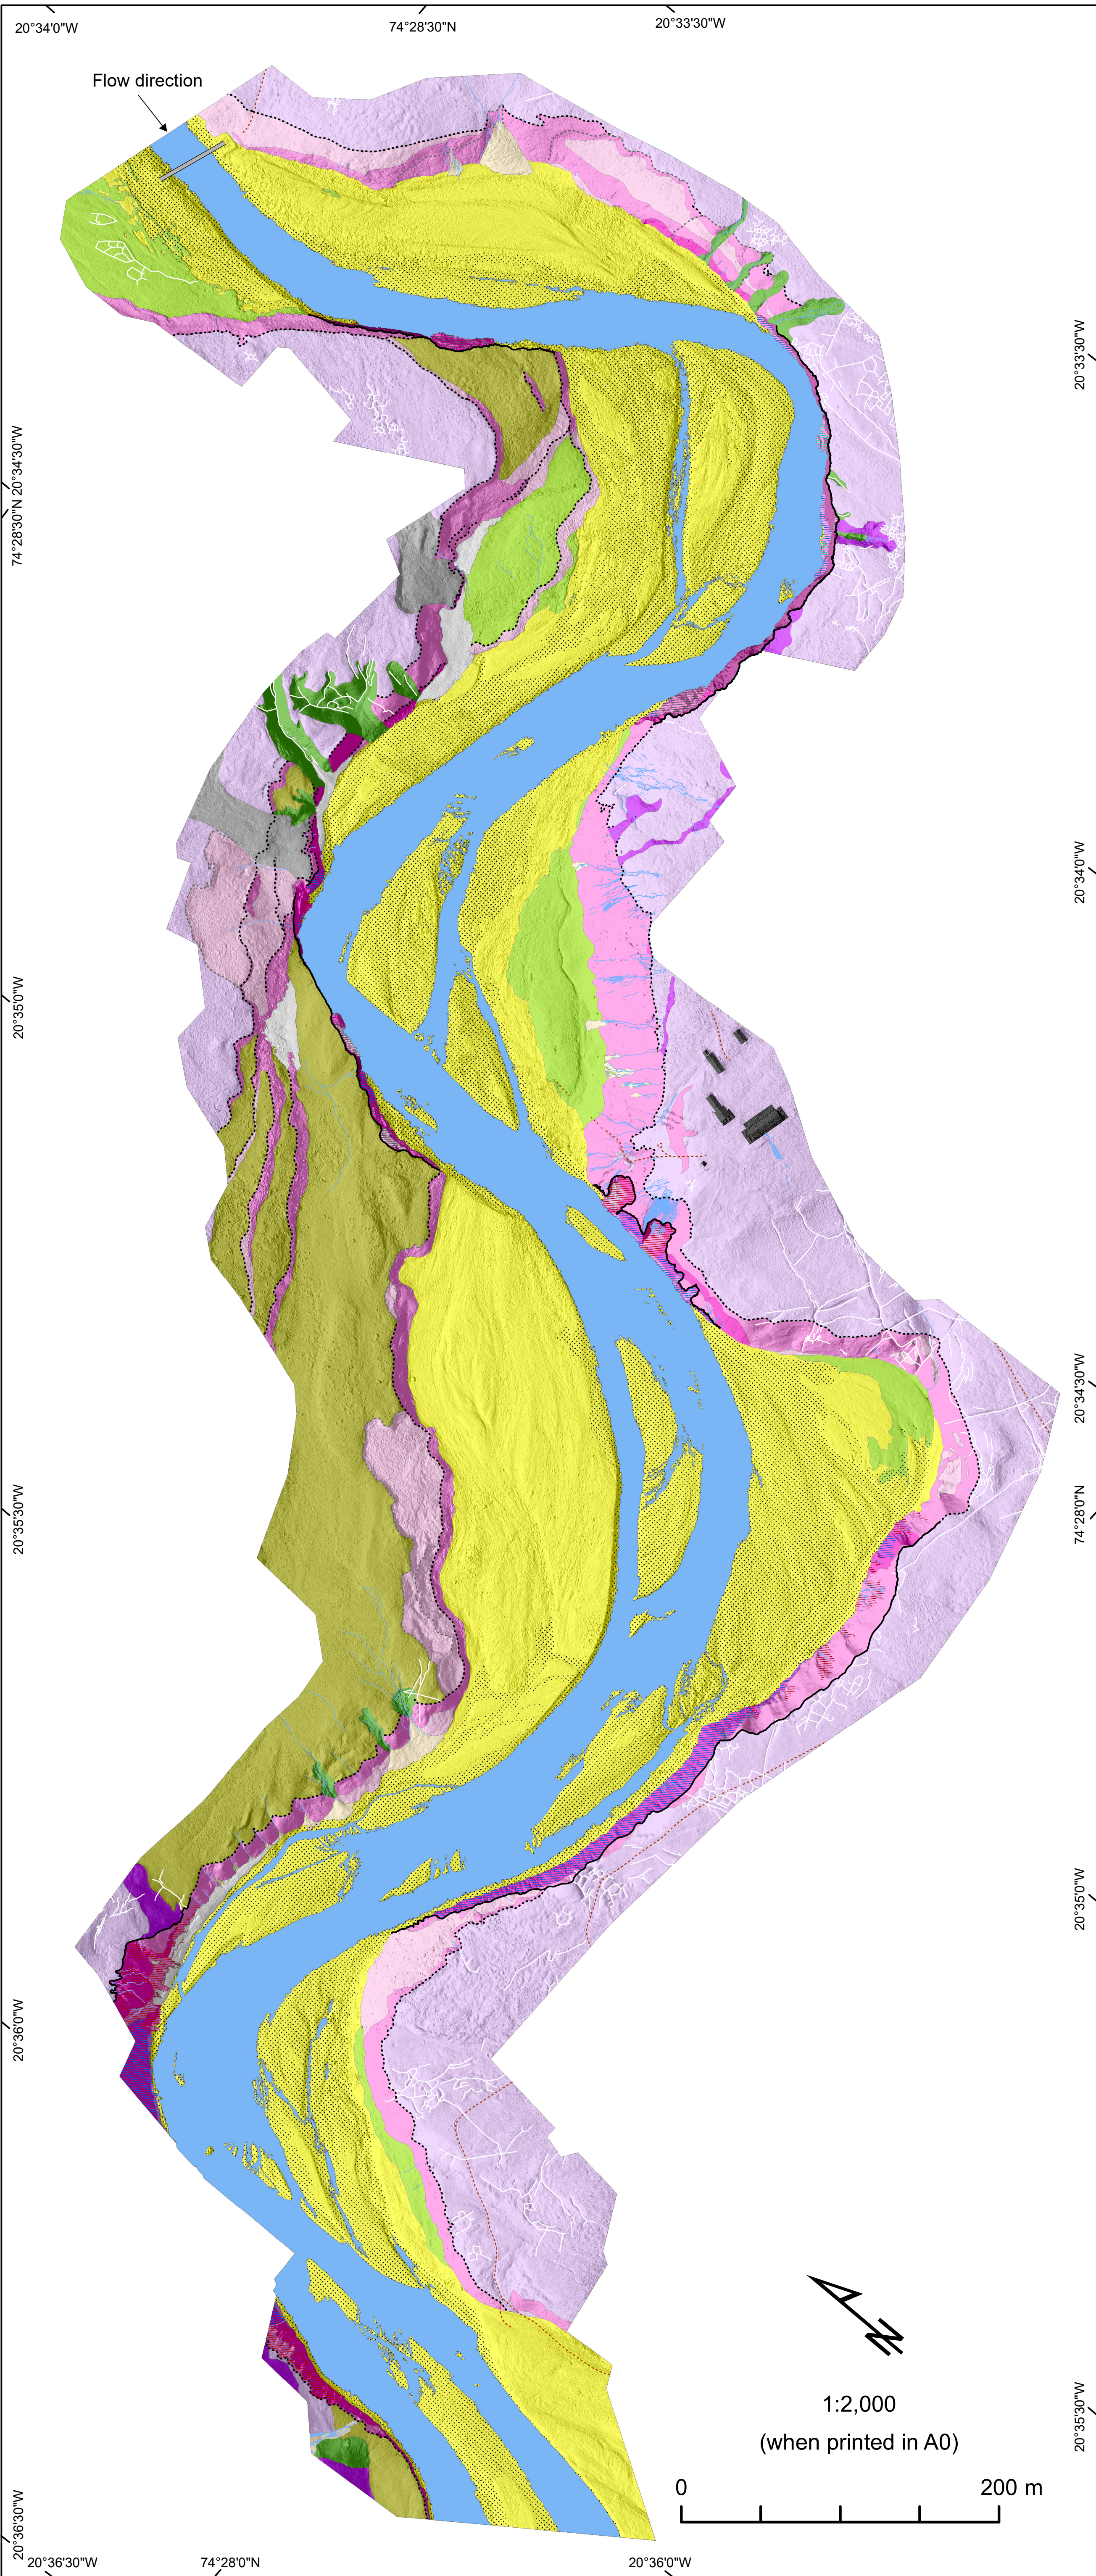

**Mass movement types**

- Debris slide (Slump)
- Debris flow
- Debris fall
- Block fall

**River bank slope types**

- Gentle slope (>15°)
- Moderately steep slope (15-35°)
- Steep slope (35-90°)
- Undercut bank (>90°)

Active fluvial scarp  
Stable fluvial scarp  
Old failure scar

**Fluvial features**

- Modern floodplain (gravel and sand deposits)
- Vegetated floodplain
- Relict fluvial terrace
- Alluvial fan
- Fresh fluvial deposit (zone of the flood)

**Periglacial features**

- Thermoerosional gully
- Solifluction lobe
- Ice wedges

**Hydrological features**

- Water
- Snow patch
- Drainage

**Other features**

- Flat area and gentle slope (less than 15°)
- Moderately and steep slope (more than 15°)

**Topographic elements**

- Zackenberg Research Station
- Pedestrian bridge
- 4x4 off-road trail

Projection: UTM zone 27N / WGS 1984; Map based on an orthophoto and digital elevation model generated from Unmanned Airborne Vehicle photographs. Map to accompany paper: A.M. Tomczyk and M.W. Ewertowski: UAV-based remote sensing of immediate changes in geomorphology following a glacial lake outburst flood, Zackenberg River, Northeast Greenland.

© Journal of Maps, 2019

E-mail contact  
Aleksandra M. Tomczyk: alto@amu.edu.pl  
Marek W. Ewertowski: ewert@amu.edu.pl
